# Supplementary material for: An in-silico approach to predict and exploit synthetic lethality in cancer metabolism
Source: PubMed Central journal article supplement (PMC5587678; doi:10.1038/s41467-017-00555-y), 2017-09-06
Supplement: 41467_2017_555_MOESM1_ESM.pdf [file 41467_2017_555_MOESM1_ESM.pdf]

## **Description of Supplementary Files**

File name: Supplementary Information

Description: Supplementary figures, supplementary tables, supplementary notes and supplementary references.

File name: Supplementary Data 1

Description: Results of calculations.

File name: Supplementary Software

Description: Matlab code used for the calculation of gMCSs.

File name: Peer review file

**Supplementary Note 1. Illustration of our gMCSs methodology for predicting gene essentiality and conceptual comparison with existing approaches in the literature.**

Our gMCSs approach is illustrated in Supplementary Figure 1. We first explain how gene expression data is integrated into our gMCS framework, and, second, the need to move from MCSs to gMCSs. Note here that MCSs, as defined in Klamt *et al.*<sup>1</sup>, are minimal subsets of reactions (and not genes) whose simultaneous removal disrupts a particular metabolic task. Given the non-trivial nature of gene-protein-reaction (GPR) rules, we illustrate below that the mapping of MCSs at the gene level does not necessarily lead to gMCSs.

Supplementary Figure 1a shows an example metabolic network consisting of 9 reactions ( $r_2$  is reversible). Here, for simplicity, we will suppose that each reaction is associated to a single gene and *vice versa*. As a consequence, in this case, computing MCSs will be equivalent to calculating gMCSs. We denote  $L$  the subset of reactions associated with lowly expressed genes. Similarly,  $\bar{L}$  is the complement of  $L$ , which includes reactions associated to moderately/highly expressed genes or reactions lacking gene annotation.

The target reaction in this network is  $r_8$ . Assume that, as a result of previous research, the gene associated to  $r_2$  is of interest and potentially related with  $r_8$  in the context analyzed. Our objective is to compute MCSs containing  $r_2$  which make reaction  $r_8$  be inactive. As in Tobalina *et al.*<sup>2</sup>, our approach is sufficiently flexible to directly search for MCSs involving a particular gene/reaction knockout of interest.

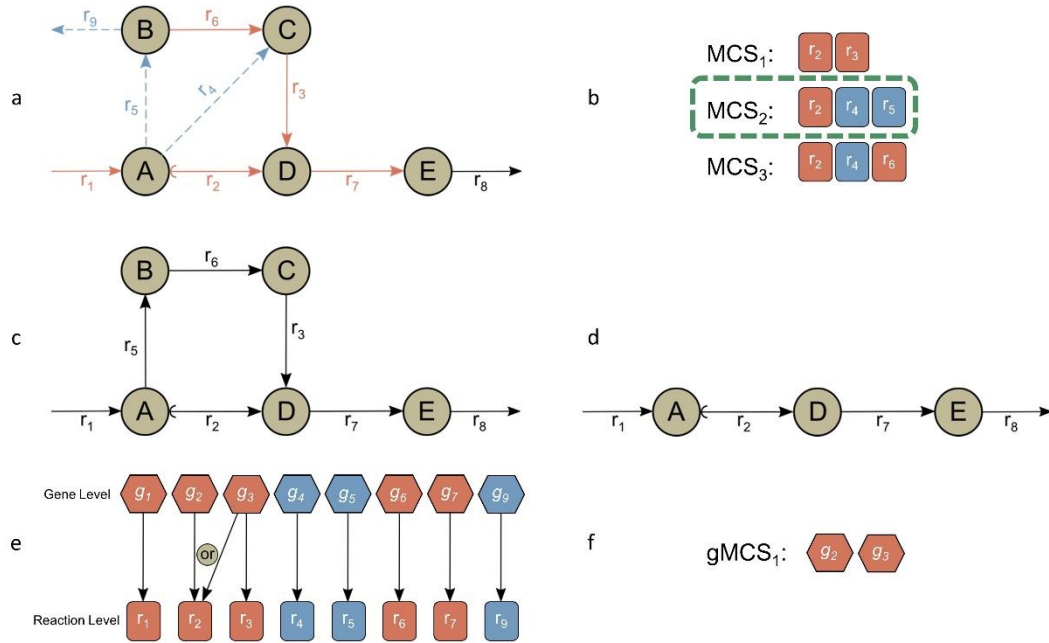

**Supplementary Figure 1: Illustrative example of the effect of gene expression data in the computation of MCSs and the need for gMCSs.** (a) Example metabolic network and reaction classification based on gene expression data. Blue dashed lines represent reactions associated with lowly expressed genes,  $L = \{4, 5, 9\}$ , and red solid lines represent reactions associated with moderately/highly expressed genes or reactions lacking gene annotation,  $\bar{L} = \{1, 2, 3, 6, 7\}$ . The target reaction is  $r_8$ ; (b) Enumeration of MCSs involving  $r_2$  based on reaction length, following Tobalina *et al.*<sup>2</sup>. Our approach, based on gene expression data, only determines  $MCS_2$  (green dashed box), which explains the essentiality of  $r_2$ ; (c-d) Contextualized networks when using iMAT<sup>3</sup> and GIMME<sup>4</sup> algorithms, respectively; (e) Non-trivial gene-protein-reaction (GPR) rules scenario for Supplementary Figure 1a; (f) Resulting gMCSs involving  $g_2$  given the GPR rules in Supplementary Figure 1e.

There exist 3 MCSs which fulfill the aforementioned requirements:  $MCS_1 = \{r_2, r_3\}$ ;  $MCS_2 = \{r_2, r_4, r_5\}$ ; and  $MCS_3 = \{r_2, r_4, r_6\}$ . Using the method presented in Tobalina *et al.*<sup>2</sup>, these MCSs would be enumerated in the order they have been written above (Supplementary Fig. 1b). Notice that, in spite of being the shortest one,  $MCS_1$  is formed by two reactions in  $\bar{L}$  and, therefore, it is not able to explain the potential lethality of  $r_2$ .  $MCS_2$ , on the other hand, consists of one reaction in  $\bar{L}$  and two reactions in  $L$ . Despite the fact that it contains more reactions than  $MCS_1$ , it is a much more interesting

synthetic lethal as it will only require blocking  $r_2$  to prevent the activity of  $r_8$ , justifying the essential role of  $r_2$  in this context.

With respect to Tobalina *et al.*<sup>2</sup>, our approach directly calculates MCSs (if any exist) of this type, namely where all their reactions involved are in  $L$ , except for the one we are interested to target ( $r_2$ ). This is particularly suitable for large metabolic networks, where full enumeration of MCSs is not computationally viable and the direct search of solutions of interest is required. Using this strategy, we can more efficiently evaluate the essentiality of a gene knockout for biomass production in a given context characterized by gene expression data.

In summary, when applied our methodology to this toy example, the second MCS involves  $r_2$  ( $\bar{L}$ ),  $r_4$  ( $L$ ) and  $r_5$  ( $L$ ), meaning that, as  $r_4$  and  $r_5$  have low activity according to gene expression data,  $r_2$  plays an essential role. In other words, the single knockout of  $r_2$  would render impossible any flux through the target reaction, namely,  $r_8$ . It is interesting to highlight that the computation of MCSs (or gMCSs) allows us, apart from predicting essentiality, to explain why a given reaction (or gene) is essential in a particular context. In this case,  $r_2$  is essential for the activity of  $r_8$  because  $r_4$  and  $r_5$  have low activity according gene expression data.

**Reconstruction-based algorithms for gene essentiality analysis.** The aim of the reconstruction methods is to identify a subset of reactions from the reference metabolic network that best fits to available expression data and satisfies steady-state condition, thermodynamic constraints and biomass production (in our case  $r_8$ ). Once the reference network is contextualized using gene expression data, gene essentiality analysis is conducted, *i.e.* identification of single gene knockouts that disrupt biomass production. In particular, we will focus on two of the most common algorithms in the literature:

GIMME<sup>4</sup> and iMAT<sup>3</sup>. For illustration, we will evaluate the essentiality of  $r_2$  in the resulting contextualized networks from these two approaches.

**iMAT.** In this method a particular reaction is removed from the reference metabolic network if, when it is blocked, its consistency with gene expression data is strictly higher than when it is forced to be active. To measure the consistency with gene expression data, iMAT gives the same weight to include a reaction in  $H$  (subset of highly expressed reactions) as to exclude a reaction in  $L$ .

For instance, if we delete  $r_4$ , the maximum consistency score with gene expression data would be 6 (agreement with  $r_1, r_2, r_3, r_4, r_6, r_7$ ), while, if we activate  $r_4$ , this score would be 5 (agreement with  $r_1, r_2, r_3, r_6, r_7$ ). In light of this,  $r_4$  is excluded from the reconstruction. The same procedure is applied to each reaction. If both scores obtain the same result, the reaction is included in the reconstruction.

When applying iMAT to our toy example, we obtain the sub-network shown in Supplementary Figure 1c. The essentiality of  $r_2$  is not predicted following the iMAT algorithm, since it has an escape pathway through  $r_3, r_5, r_6$ .

Note here that, in order to evaluate the performance of iMAT in the Results section of the main text, given its high computational demand, we had to introduce modifications with respect to the original version of the iMAT presented in Shlomi *et al.*<sup>3</sup> (see Supplementary Note 2).

**GIMME.** This approach first calculates an inconsistency score for each reaction in  $L$ , as a function of the difference between its expression level and the threshold which determines if a reaction is expressed or not. As reactions in  $L$  are not supposed to take part in the reconstruction, this algorithm includes all reactions in  $\bar{L}$  and some reactions in  $L$  which minimize the sum of inconsistency scores. This minimization problem must satisfy steady-state condition, thermodynamic constraints and biomass production.

Supplementary Figure 1d shows the reconstructed network obtained following GIMME. This method does predict the essential role of  $r_2$ , that is, there are not alternative pathways to reach  $r_8$  after knocking out  $r_2$ . Nevertheless, GIMME is not able to explain the reason why  $r_2$  is essential, since when the reconstruction is conducted,  $r_4$  and  $r_5$  are removed from the solution network and, therefore, this information is lost.

Note here that, in order to evaluate the performance of GIMME in the Results section of the main text, we implemented the algorithm presented in Becker *et al.*<sup>4</sup>. As done with our gMCS approach, we used the Gene Expression Barcode 3.0 (ref. 5) to obtain the set lowly expressed genes,  $L$ .

**Extending MCSs at the gene level (gMCSs).** In contrast with existing methods for MCS computation<sup>2,6</sup>, we extend the analysis to the gene level and determine gMCSs. It is important to emphasize that the subset of genes associated with the reactions involved in a particular MCS, determined using Gene-Protein-Reaction (GPR) rules, does not necessarily constitute a minimal knockout strategy. This is due to the fact that GPR rules are not always trivial (one-to-one association) and may involve complex relationships. In Recon2.v04 (ref. 7), for instance, this is the case for 88% of genes included. For illustration, assume that we are concerned in finding gMCSs involving  $g_2$  for the toy metabolic network in Supplementary Figure 1a in a slightly more complex GPR rules scenario (Supplementary Fig. 1e). In this case,  $g_2$  is only related to  $r_2$ , which can be catalyzed by one additional enzyme encoded by  $g_3$ ; the rest of reactions are catalyzed by only one enzyme. In order to delete  $r_2$  (the only potential effect over the network of knocking out  $g_2$ ), we need to suppress  $g_2$  and  $g_3$  simultaneously and, when this is achieved,  $r_3$  is indirectly deleted. As  $g_2$  is necessarily coupled to  $g_3$  to have any effect and they form a synthetic lethal, the knockout of  $g_4$ ,  $g_5$  or  $g_6$  is not necessary any more to disrupt  $r_8$ .

Therefore, if we obtain the genes associated to  $MCS_1$ - $MCS_3$  using GPR rules, the only true minimal gene knockout solution would be  $gMCS_1=\{g_2, g_3\}$  (Supplementary Fig. 1f). As  $g_3$  is not included in the  $L$  set, our approach would lead to an ‘infeasible’ problem, *i.e.* with no solution. We conclude that  $g_2$  is not essential for the activation of  $r_8$  in this scenario, in disagreement to the solution previously achieved when the analysis restricted at the reaction level. With the use of gMCSs, our approach generalizes MCSs at the gene level, enabling the integration of complex GPR rules and overcoming issues considered above. Full details as to how the methodology presented in Tobalina *et al.*<sup>2</sup>, was adapted to calculate gMCSs and incorporate gene expression data can be found in the Methods section of the main text.

Note here that for the study of *RRM1* in Multiple Myeloma (MM) conducted in the main text, we also calculated MCSs for *RRM1* (instead of gMCSs) for the four cell lines considered. When returned MCSs were mapped to the gene level, the obtained solutions in all cases were incorrect (6 out of 6) (see Supplementary Data 1), *i.e.* certainly they were not gMCSs. This illustrates the importance of moving from MCSs to gMCSs, as we propose here.

**Supplementary Note 2. Computational implementation of iMAT.** The central optimization model proposed by iMAT for network reconstruction is the following mixed-integer linear programming (MILP):

$$\max(\sum_{i \in H}(y_i^+ + y_i^-) + \sum_{i \in L} y_i^+) \quad (\text{S1})$$

Subject to:

$$\mathbf{S} \cdot \mathbf{v} = \mathbf{0} \quad (\text{S2})$$

$$\mathbf{v}_{\min} \leq \mathbf{v} \leq \mathbf{v}_{\max} \quad (\text{S3})$$

$$v_{biomass} \geq v_{biomass}^* \quad (\text{S4})$$

$$v_i + y_i^+ \cdot (v_{min, i} - \varepsilon) \geq v_{min, i}, \quad \forall i \in H \quad (\text{S5})$$

$$v_i + y_i^- \cdot (v_{max, i} + \varepsilon) \leq v_{max, i}, \quad \forall i \in H \quad (\text{S6})$$

$$v_{min, i} \cdot (1 - y_i^+) \leq v_i \leq v_{max, i} \cdot (1 - y_i^+), \quad \forall i \in L \quad (\text{S7})$$

$$\mathbf{v} \in R^n \quad (\text{S8})$$

$$y_i^+, y_i^- \in \{0, 1\}, \quad \forall i \in H \quad (\text{S9})$$

$$y_i^+ \in \{0, 1\}, \quad \forall i \in L \quad (\text{S10})$$

, where  $H$  and  $L$  represents the subset of highly and lowly expressed reactions, respectively. For reactions in  $H$ , binary variables  $y_i^+ = 1$  if  $v_i \geq \varepsilon$ , 0 otherwise; and  $y_i^- = 1$  if  $v_i \leq -\varepsilon$ , 0 otherwise. For reactions in  $L$ ,  $y_i^+ = 1$  if  $v_i = 0$ , 0 otherwise. We fixed the same values of  $v_{min}$  and  $v_{max}$  used in our gMCS approach. Finally,  $v_{biomass}^*$  represents the minimum flux required through the biomass reactions (here 0.001) and  $n$  denotes the number of reactions.



These optimization problem aims to strike a balance between the inclusion of  $H$  reactions and the exclusion of  $L$  reactions. Aware of the possible existence of alternative solutions, iMAT proposes an iterative solution scheme to assign a confidence score for the inclusion or exclusion of each reaction, namely comparing the objective value when i)  $v_i = 0$  and ii)  $v_i \neq 0$  ( $v_i \geq \varepsilon$  or  $v_i \leq -\varepsilon$ ). With the current size of Recon2.v04 (ref. 7), this approach is prohibitive in terms of computation time, as we need to solve at least  $2*n$  MILPs of similar complexity as the one shown above for each sample. To overcome this issue, we carried out the following implementation:

- 1) Solve the MILP shown above (equations (S1)-(S10)), extract the value of fluxes in the solution found (henceforth denoted as  $\mathbf{u}$ ) and include non-zero fluxes in the output reconstruction. These active reactions must be part of the reconstruction since no better objective value can be found and, therefore, if they are knocked out, the objective value will be less or equal than the current one.

- 2) Evaluate whether other reactions without expression data available (set  $E$ ), currently not part in the reconstruction, can be included. To that end, we force the fluxes in the same direction found as in the previous solution ( $\mathbf{u}$ ), force to zero fluxes in  $H$  and  $L$  inactive in the previous solution and maximizes the number of reactions in  $E$ , which leads to the following MILP:

$$\max(\sum_{i \in E} z_i) \quad (\text{S11})$$

Subject to:

$$\mathbf{S} \cdot \mathbf{v} = \mathbf{0} \quad (\text{S12})$$

$$v_{\min, i} \cdot z_i \leq v_i \leq v_{\max, i} \cdot z_i, \quad i = 1, 2, \dots, n \quad (\text{S13})$$

$$v_{\text{biomass}} \geq v_{\text{biomass}}^* \quad (\text{S14})$$

$$v_i \geq \varepsilon \text{ if } u_i \geq \varepsilon, \quad \forall i \in H, L \quad (\text{S15})$$

$$v_i \leq -\varepsilon \text{ if } u_i \leq -\varepsilon, \quad \forall i \in H, L \quad (\text{S16})$$

$$v_i = 0 \text{ if } u_i = 0, \quad \forall i \in H, L \quad (\text{S17})$$

$$\mathbf{v} \in R^n \quad (\text{S18})$$

$$z_i \in \{0, 1\}, \quad \forall i \in H, L \quad (\text{S19})$$

With this second step, we keep the objective value found in Step 1 (given by reactions in  $H$  and  $L$ ) and identify alternative pathways through reactions in  $E$ . This approach constitutes a computationally tractable approximation to iMAT. In terms of gene essentiality analysis, this approximation results in a best-case scenario, as we may have additional reactions in  $H$  and  $L$  that could be part of the reconstruction, which add new escape pathways and, therefore, would reduce the list of essential genes. In other words, with this implementation, a predicted non-essential gene is certainly non-essential in iMAT; however, a predicted essential gene could be non-essential in iMAT.

**Supplementary Note 3. GPR rules for *RRM1*.** As reported in the literature<sup>8</sup>, *RRM1* constitutes the large regulatory subunit of the enzyme ribonucleotide reductase (RNR), which catalyzes the conversion of ribonucleoside diphosphates into deoxyribonucleoside diphosphates. *RRM1* binds to RRM2 or RRM2B to conduct metabolic activity. Recon2.v04 (ref. 7) correctly includes 4 cytosolic and 2 mitochondrial reactions for this conversion. However, their GPR rules are flawed. They are defined as (*RRM1* and *RRM2*) or (*RRM2B*), when it should read (*RRM1*) and (*RRM2* or *RRM2B*). The GPR rules for these reactions were corrected accordingly.

Recon2.v04 includes 4 additional cytosolic reactions associated with human RNR. These reactions convert ribonucleoside triphosphates into their corresponding deoxyribonucleoside triphosphates. These reactions, however, are not annotated in the literature to the human RNR<sup>9</sup>. In fact, these reactions are annotated in KEGG<sup>10</sup> to a different type of RNR, discovered in other organisms ([http://www.genome.jp/dbget-bin/www\\_bget?ec:1.17.4.2](http://www.genome.jp/dbget-bin/www_bget?ec:1.17.4.2)). Given the complexity of biosynthesis and degradation pathways of deoxyribonucleotide triphosphates, where new enzymes and reactions are discovered day by day<sup>11</sup>, we used a conservative strategy and decided to keep these reactions with unknown GPR rules. Note that if these reactions were deleted from the reference metabolic network, *RRM1* becomes an essential gene for any type of cell, which is not in consonance with functional studies of *RRM1* silencing<sup>12</sup>.

**Supplementary Note 4. G matrix.** As noted in the main text, we introduce the binary  $g \times n$  matrix  $\mathbf{G}$ , which defines for each row the set of blocked reactions arising from the knockout of a particular subset of genes in  $L$ . Genes associated with each row in  $\mathbf{G}$  must be functionally interrelated and their simultaneous knockout is required to delete at least one of the reactions in the metabolic network.

For illustration, let us consider the toy example in Supplementary Figure 2, where we have four genes and six reactions. Blue color represents genes in  $L$  and reactions that become inactive when genes in  $L$  are knocked out (lowly expressed reactions). Red color shows genes in  $\bar{L}$  and reactions potentially active even when genes in  $L$  are knocked out. For example,  $r_4$  is not inactivated when genes in  $L$  are knocked out.

For matrix  $\mathbf{G}$ , we only consider genes in  $L$ . For example,  $g_3$  is not considered. Potential knockouts consist on all combinations without repetition of the genes in  $L$ . In our case, we have to analyze 7 different cases, namely,  $\{g_1\}$ ,  $\{g_2\}$ ,  $\{g_4\}$ ,  $\{g_1, g_2\}$ ,  $\{g_1, g_4\}$ ,  $\{g_2, g_4\}$  and  $\{g_1, g_2, g_4\}$ .

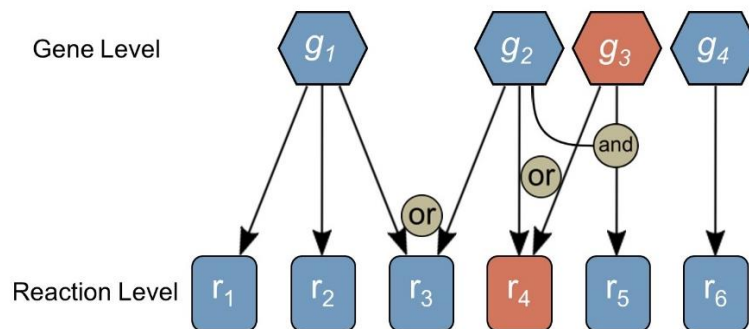

**Supplementary Figure 2: Example GPR Rules and the calculation of its G Matrix.** Enzyme encoded by  $g_1$  catalyzes three different reactions:  $r_1$ ,  $r_2$  and  $r_3$ ;  $r_3$  is catalyzed by two different enzymes encoded by  $g_1$  and  $g_2$ ;  $r_4$  is catalyzed by two different enzymes encoded by  $g_2$  and  $g_3$ ;  $r_5$  is catalyzed by an enzymatic complex that comprises  $g_2$  and  $g_3$ ;  $r_6$  is catalyzed by enzyme encoded by  $g_4$ .

The first step is about calculating which reactions become inactive when carrying out each of the 7 gene knockout combinations and introducing this information in the intermediate matrix  $\mathbf{G}'$ . Regarding the GPR rules in Supplementary Figure 2, this will result in the following:

$$\mathbf{G}' = \begin{bmatrix} 1 & 1 & 0 & 0 & 0 & 0 \\ 0 & 0 & 0 & 0 & 1 & 0 \\ 0 & 0 & 0 & 0 & 0 & 1 \\ 1 & 1 & 1 & 0 & 1 & 0 \\ 1 & 1 & 0 & 0 & 0 & 1 \\ 0 & 0 & 0 & 0 & 1 & 1 \\ 1 & 1 & 0 & 0 & 1 & 1 \end{bmatrix} \begin{matrix} \{g_1\} \\ \{g_2\} \\ \{g_4\} \\ \{g_1, g_2\} \\ \{g_1, g_4\} \\ \{g_2, g_4\} \\ \{g_1, g_2, g_4\} \end{matrix} \quad (\text{S20})$$

Notice that, for example,  $r_3$  can only be inactivated when knocking out  $g_1$  and  $g_2$  simultaneously, but either single deletion of these genes does not affect to the aforementioned reaction. However, just the contrary happens with  $\{g_1, g_4\}$ ,  $\{g_2, g_4\}$ ,  $\{g_1, g_2, g_4\}$ , meaning that the same set of reactions becomes inactive by combining at least two different rows in  $\mathbf{G}'$ . For example, the combination of  $\{g_1\}$  and  $\{g_4\}$  inactivate the same set of reactions as  $\{g_1, g_4\}$ . As a consequence, the last three rows of  $\mathbf{G}'$  are removed. The final  $\mathbf{G}$  matrix is shown in equation (S21).

$$\mathbf{G} = \begin{bmatrix} 1 & 1 & 0 & 0 & 0 & 0 \\ 0 & 0 & 0 & 0 & 1 & 0 \\ 0 & 0 & 0 & 0 & 0 & 1 \\ 1 & 1 & 1 & 0 & 1 & 0 \end{bmatrix} \begin{matrix} \{g_1\} \\ \{g_2\} \\ \{g_4\} \\ \{g_1, g_2\} \end{matrix} \quad (\text{S21})$$

The naïve approach considered above which calculates all the possible combinations of genes in  $L$  is not computationally tractable. To overcome this issue, we have only calculated the combinations of genes in  $L$  related to each lowly expressed reaction. In the example discussed above,  $r_1$ ,  $r_2$ ,  $r_3$ ,  $r_5$  and  $r_6$  are lowly expressed (colored blue), so the combinations of genes to study will be:  $g_1$  related to  $r_1$  and  $r_2$ ;  $g_2$  related to  $r_5$ ;  $g_4$  related to  $r_6$ ; and  $\{g_1, g_2\}$  related to  $r_3$ .

Note that all combinations containing  $g_3$  have not been included because it is not lowly expressed. As a consequence, following this method we obtain the same  $\mathbf{G}$  matrix in a more straightforward way.

The  $\mathbf{G}$  matrix is used in our algorithm to define the potential list of reaction knockouts arising from the combination of genes in  $L$  (see equation (4) in the main paper).

## Supplementary Figures.

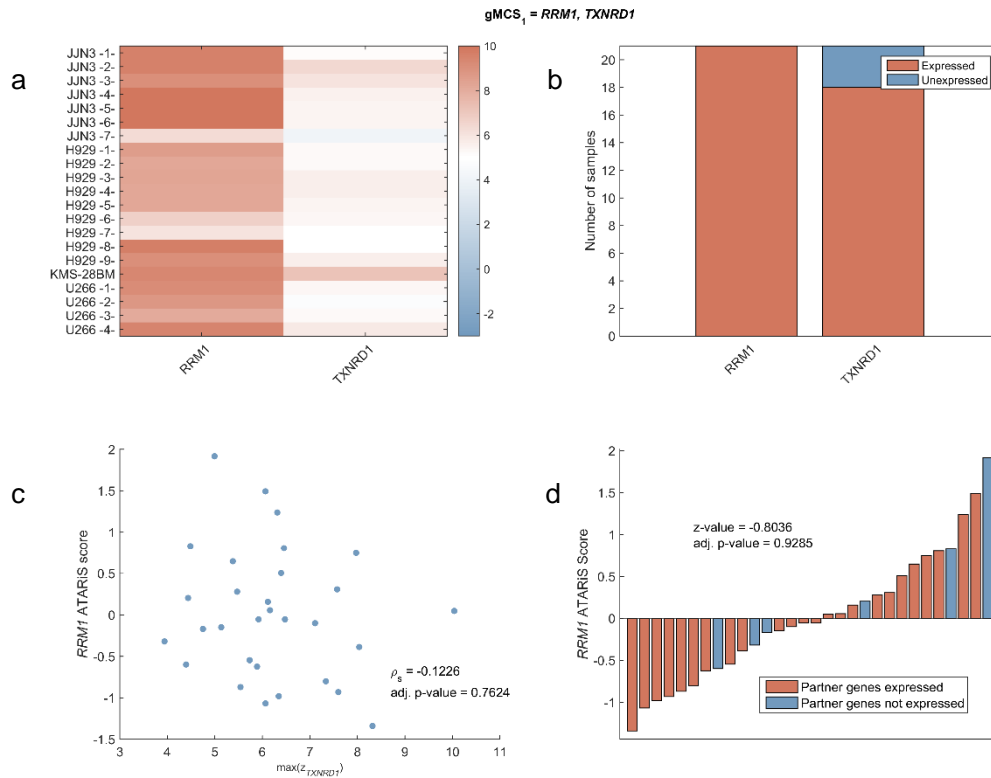

**Supplementary Figure 3: gMCS<sub>1</sub> analysis.** (a) Heatmap of Barcode z-scores<sup>5</sup> of *RRM1* and its partner genes (involved in gMCS<sub>1</sub>) in different MM samples analyzed; (b) Number of MM samples where *RRM1* and its partner genes (involved in gMCS<sub>1</sub>) are expressed/unexpressed, according to Barcode threshold of expression ( $\geq 5$ ). This gMCS explains the essentiality of *RRM1* in 3 samples; (c) Spearman's correlation analyzing the dependence of *RRM1* ATARiS score on gene expression levels of partner genes in gMCS<sub>1</sub>; (d) Bar plot of *RRM1* ATARiS score when partner genes are (or not) expressed in gMCS<sub>1</sub>. To decide whether a gene is expressed, we used the standard threshold provided by the Gene Expression Barcode algorithm 3.0.

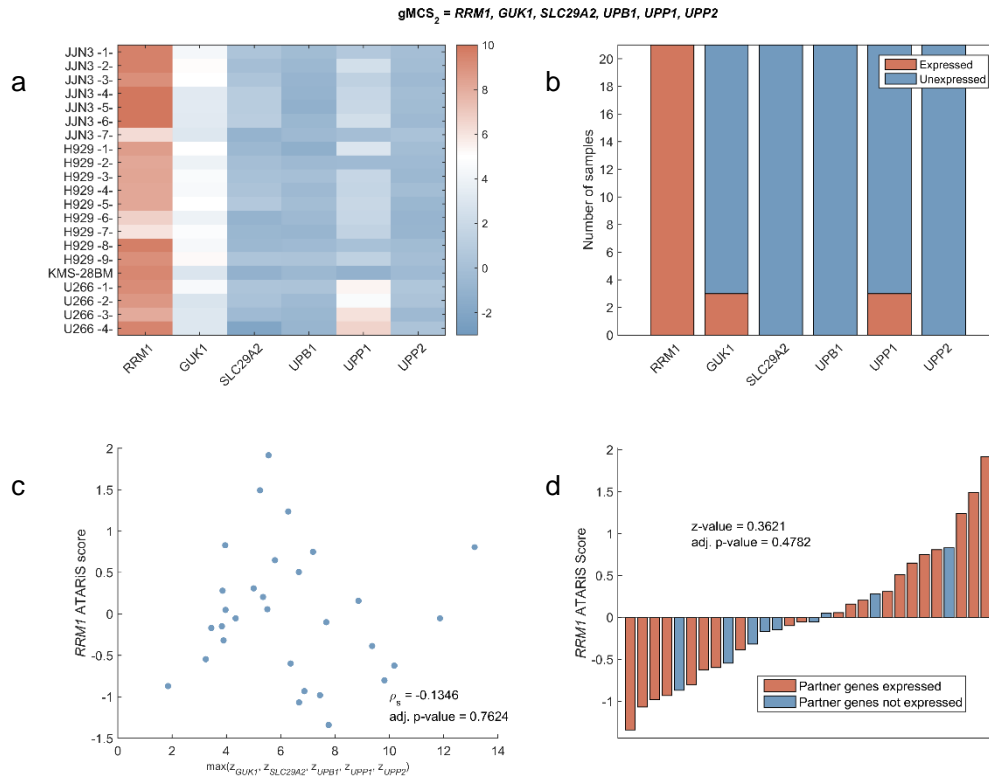

**Supplementary Figure 4: gMCS<sub>2</sub> analysis.** (a) Heatmap of Barcode z-scores<sup>5</sup> of *RRM1* and its partner genes (involved in gMCS<sub>2</sub>) in different MM samples analyzed; (b) Number of MM samples where *RRM1* and its partner genes (involved in gMCS<sub>2</sub>) are expressed/unexpressed, according to Barcode threshold of expression ( $z \geq 5$ ). This gMCS explains the essentiality of *RRM1* in 15 samples; (c) Spearman's correlation analyzing the dependence of *RRM1* ATARIS score on gene expression levels of partner genes in gMCS<sub>2</sub>; (d) Bar plot of *RRM1* ATARIS score when partner genes are (or not) expressed in gMCS<sub>2</sub>. To decide whether a gene is expressed, we used the standard threshold provided by the Gene Expression Barcode algorithm 3.0.



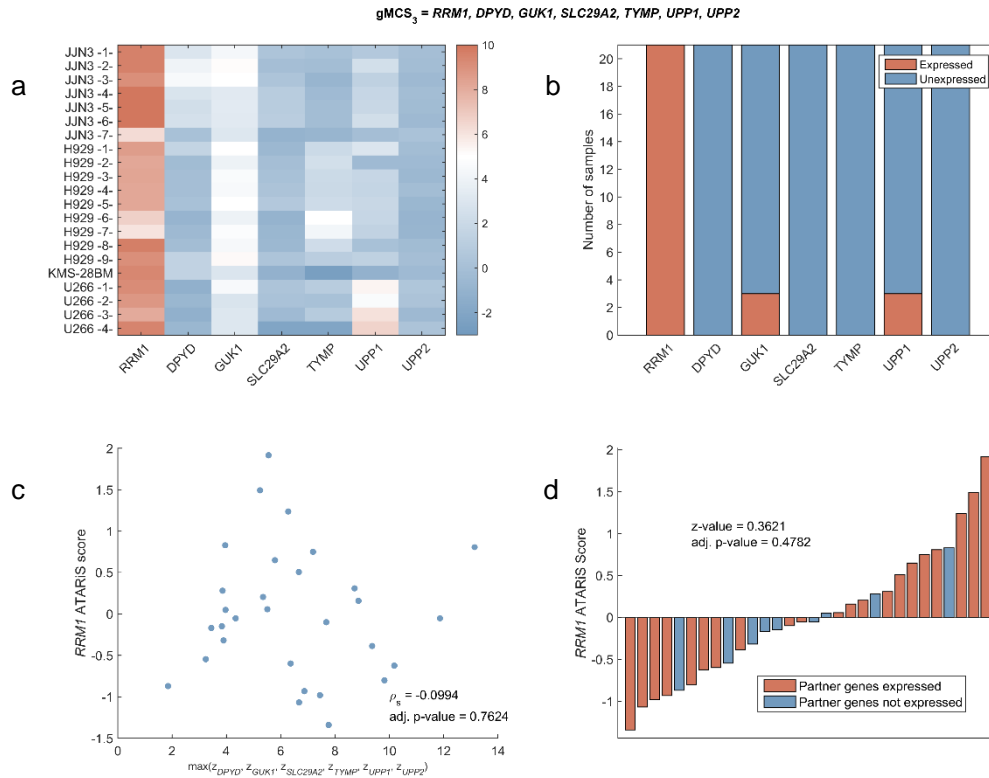

**Supplementary Figure 5: gMCS<sub>3</sub> analysis.** (a) Heatmap of Barcode z-scores<sup>5</sup> of *RRM1* and its partner genes (involved in gMCS<sub>3</sub>) in different MM samples analyzed; (b) Number of MM samples where *RRM1* and its partner genes (involved in gMCS<sub>3</sub>) are expressed/unexpressed, according to Barcode threshold of expression ( $z \geq 5$ ). This gMCS explains the essentiality of *RRM1* in 15 samples; (c) Spearman's correlation analyzing the dependence of *RRM1* ATARiS score on gene expression levels of partner genes in gMCS<sub>3</sub>; (d) Bar plot of *RRM1* ATARiS score when partner genes are (or not) expressed in gMCS<sub>3</sub>. To decide whether a gene is expressed, we used the standard threshold provided by the Gene Expression Barcode algorithm 3.0.

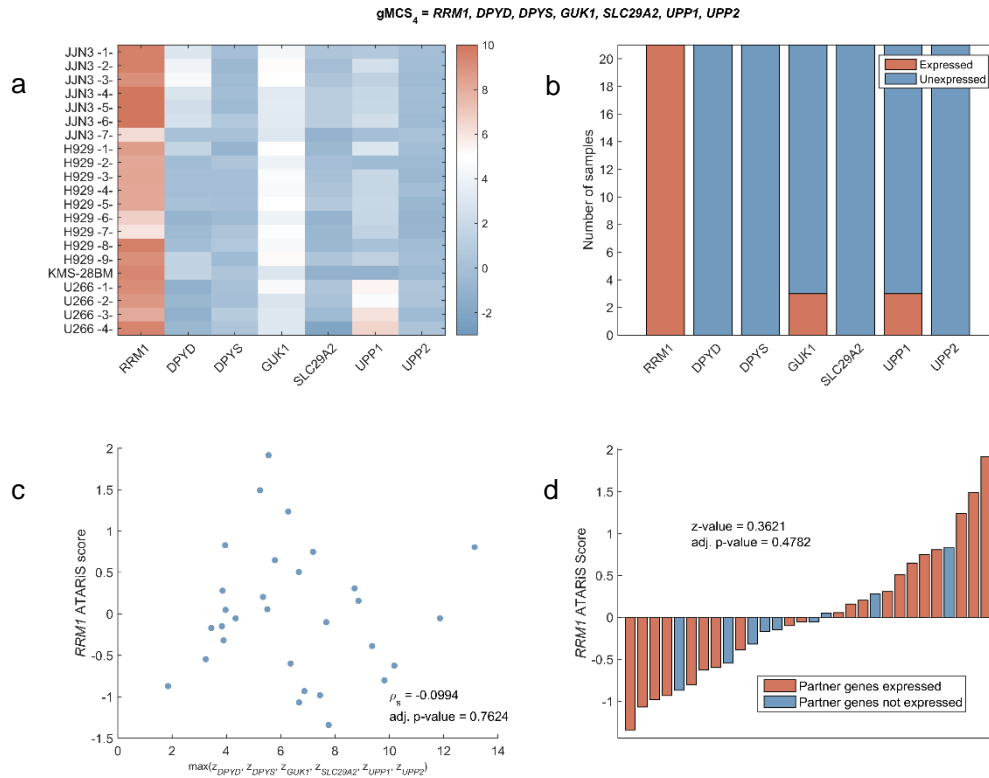

**Supplementary Figure 6: gMCS<sub>4</sub> analysis.** (a) Heatmap of Barcode z-scores<sup>5</sup> of *RRM1* and its partner genes (involved in gMCS<sub>4</sub>) in different MM samples analyzed; (b) Number of MM samples where *RRM1* and its partner genes (involved in gMCS<sub>4</sub>) are expressed/unexpressed, according to Barcode threshold of expression ( $z \geq 5$ ). This gMCS explains the essentiality of *RRM1* in 15 samples; (c) Spearman's correlation analyzing the dependence of *RRM1* ATARiS score on gene expression levels of partner genes in gMCS<sub>4</sub>; (d) Bar plot of *RRM1* ATARiS score when partner genes are (or not) expressed in gMCS<sub>4</sub>. To decide whether a gene is expressed, we used the standard threshold provided by the Gene Expression Barcode algorithm 3.0.

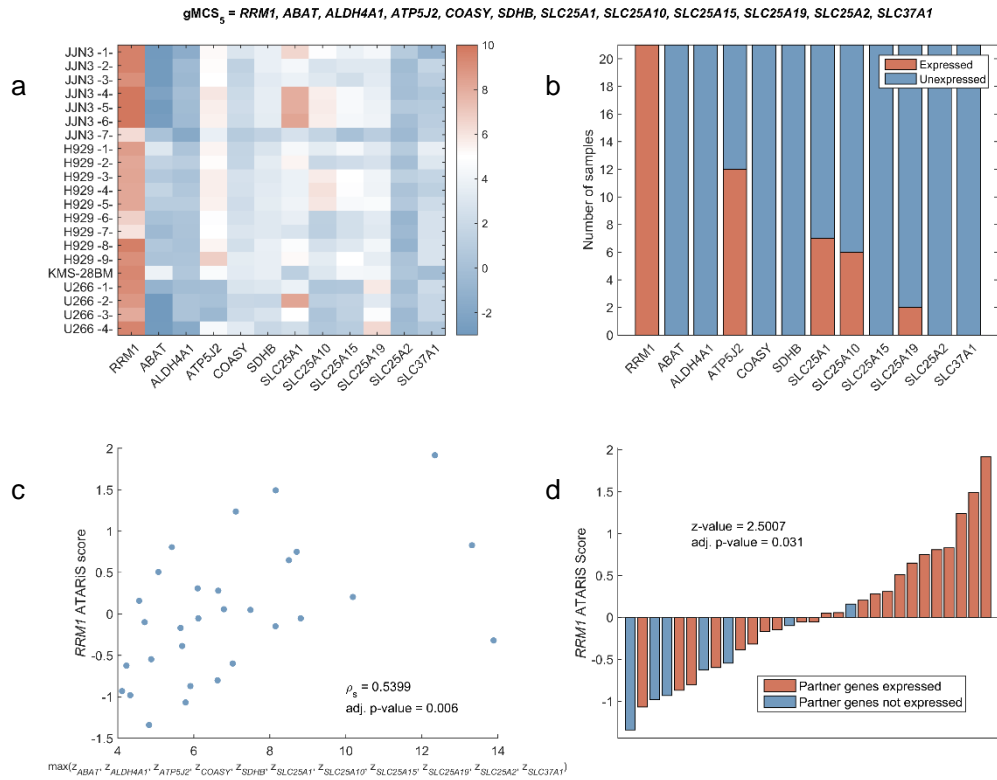

**Supplementary Figure 7: gMCS<sub>5</sub> analysis.** (a) Heatmap of Barcode z-scores<sup>5</sup> of *RRM1* and its partner genes (involved in gMCS<sub>5</sub>) in different MM samples analyzed; (b) Number of MM samples where *RRM1* and its partner genes (involved in gMCS<sub>5</sub>) are expressed/unexpressed, according to Barcode threshold of expression ( $z \geq 5$ ). This gMCS explains the essentiality of *RRM1* in 6 samples; (c) Spearman's correlation analyzing the dependence of *RRM1* ATARiS score on gene expression levels of partner genes in gMCS<sub>5</sub>; (d) Bar plot of *RRM1* ATARiS score when partner genes are (or not) expressed in gMCS<sub>5</sub>. To decide whether a gene is expressed, we used the standard threshold provided by the Gene Expression Barcode algorithm 3.0.

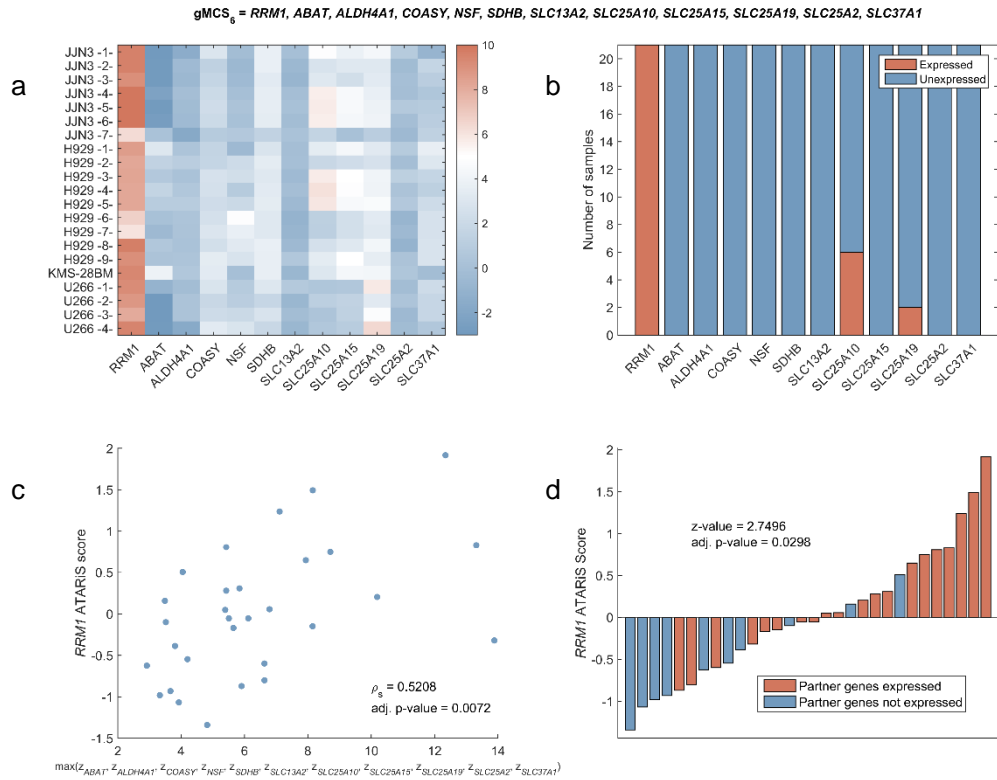

**Supplementary Figure 8: gMCS<sub>6</sub> analysis.** (a) Heatmap of Barcode z-scores<sup>5</sup> of *RRM1* and its partner genes (involved in gMCS<sub>6</sub>) in different MM samples analyzed; (b) Number of MM samples where *RRM1* and its partner genes (involved in gMCS<sub>6</sub>) are expressed/unexpressed, according to Barcode threshold of expression ( $z \geq 5$ ). This gMCS explains the essentiality of *RRM1* in 13 samples; (c) Spearman's correlation analyzing the dependence of *RRM1* ATARiS score on gene expression levels of partner genes in gMCS<sub>6</sub>; (d) Bar plot of *RRM1* ATARiS score when partner genes are (or not) expressed in gMCS<sub>6</sub>. To decide whether a gene is expressed, we used the standard threshold provided by the Gene Expression Barcode algorithm 3.0.

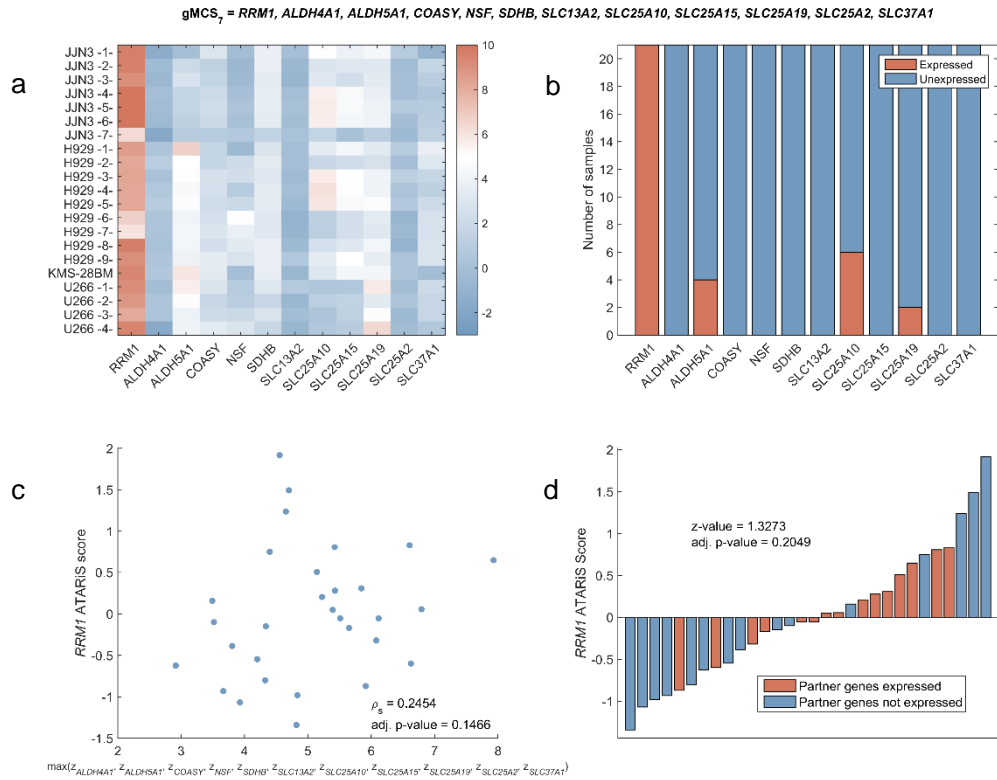

**Supplementary Figure 9: gMCS<sub>7</sub> analysis.** (a) Heatmap of Barcode z-scores<sup>5</sup> of *RRM1* and its partner genes (involved in gMCS<sub>7</sub>) in different MM samples analyzed; (b) Number of MM samples where *RRM1* and its partner genes (involved in gMCS<sub>7</sub>) are expressed/unexpressed, according to Barcode threshold of expression ( $z \geq 5$ ). This gMCS explains the essentiality of *RRM1* in 10 samples; (c) Spearman's correlation analyzing the dependence of *RRM1* ATARIS score on gene expression levels of partner genes in gMCS<sub>7</sub>; (d) Bar plot of *RRM1* ATARIS score when partner genes are (or not) expressed in gMCS<sub>7</sub>. To decide whether a gene is expressed, we used the standard threshold provided by the Gene Expression Barcode algorithm 3.0.

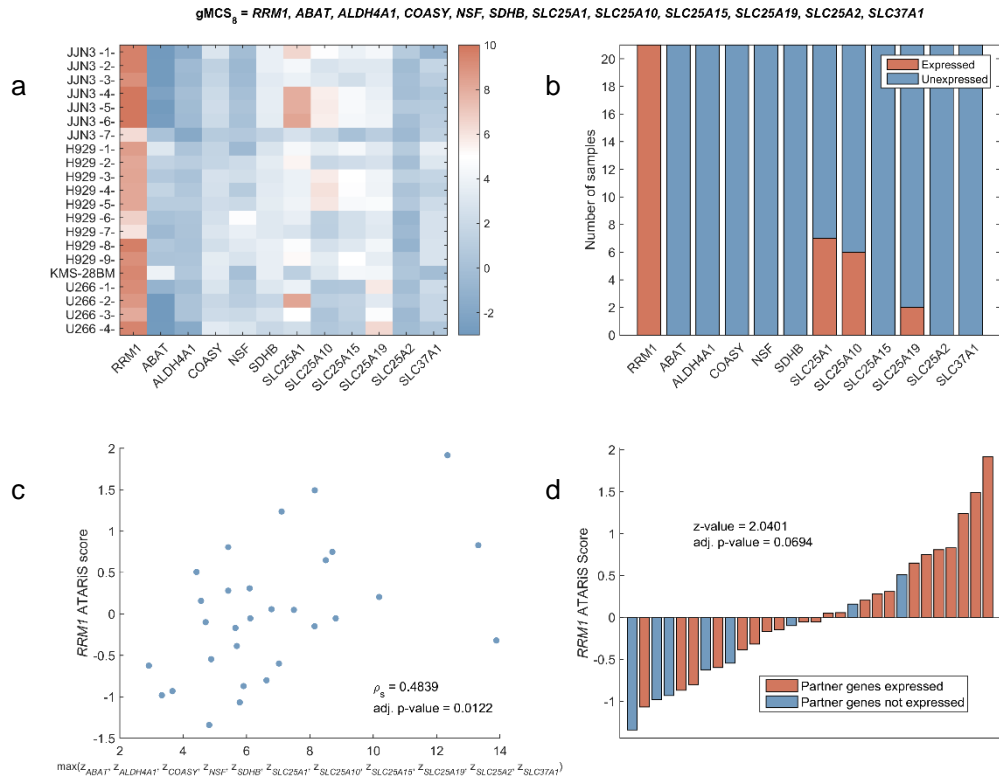

**Supplementary Figure 10: gMCS<sub>8</sub> analysis.** (a) Heatmap of Barcode z-scores<sup>5</sup> of *RRM1* and its partner genes (involved in gMCS<sub>8</sub>) in different MM samples analyzed; (b) Number of MM samples where *RRM1* and its partner genes (involved in gMCS<sub>8</sub>) are expressed/unexpressed, according to Barcode threshold of expression ( $z \geq 5$ ). This gMCS explains the essentiality of *RRM1* in 9 samples; (c) Spearman's correlation analyzing the dependence of *RRM1* ATARiS score on gene expression levels of partner genes in gMCS<sub>8</sub>; (d) Bar plot of *RRM1* ATARiS score when partner genes are (or not) expressed in gMCS<sub>8</sub>. To decide whether a gene is expressed, we used the standard threshold provided by the Gene Expression Barcode algorithm 3.0.

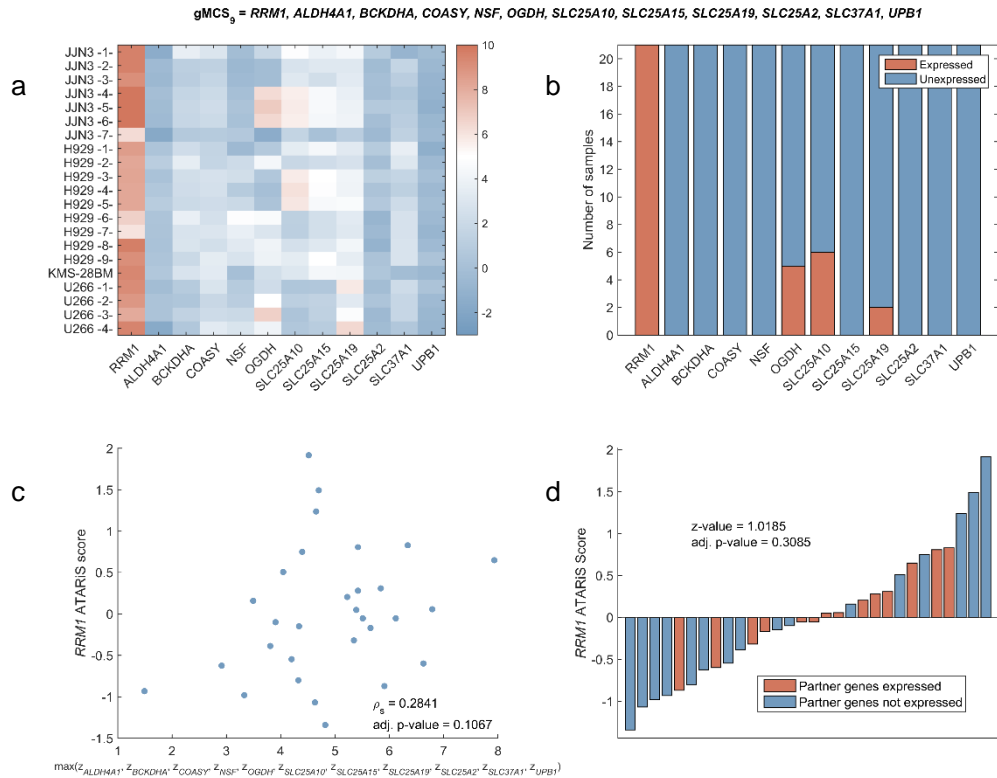

**Supplementary Figure 11: gMCS<sub>9</sub> analysis.** (a) Heatmap of Barcode z-scores<sup>5</sup> of *RRM1* and its partner genes (involved in gMCS<sub>9</sub>) in different MM samples analyzed; (b) Number of MM samples where *RRM1* and its partner genes (involved in gMCS<sub>9</sub>) are expressed/unexpressed, according to Barcode threshold of expression ( $z \geq 5$ ). This gMCS explains the essentiality of *RRM1* in 11 samples; (c) Spearman's correlation analyzing the dependence of *RRM1* ATARiS score on gene expression levels of partner genes in gMCS<sub>9</sub>; (d) Bar plot of *RRM1* ATARiS score when partner genes are (or not) expressed in gMCS<sub>9</sub>. To decide whether a gene is expressed, we used the standard threshold provided by the Gene Expression Barcode algorithm 3.0.

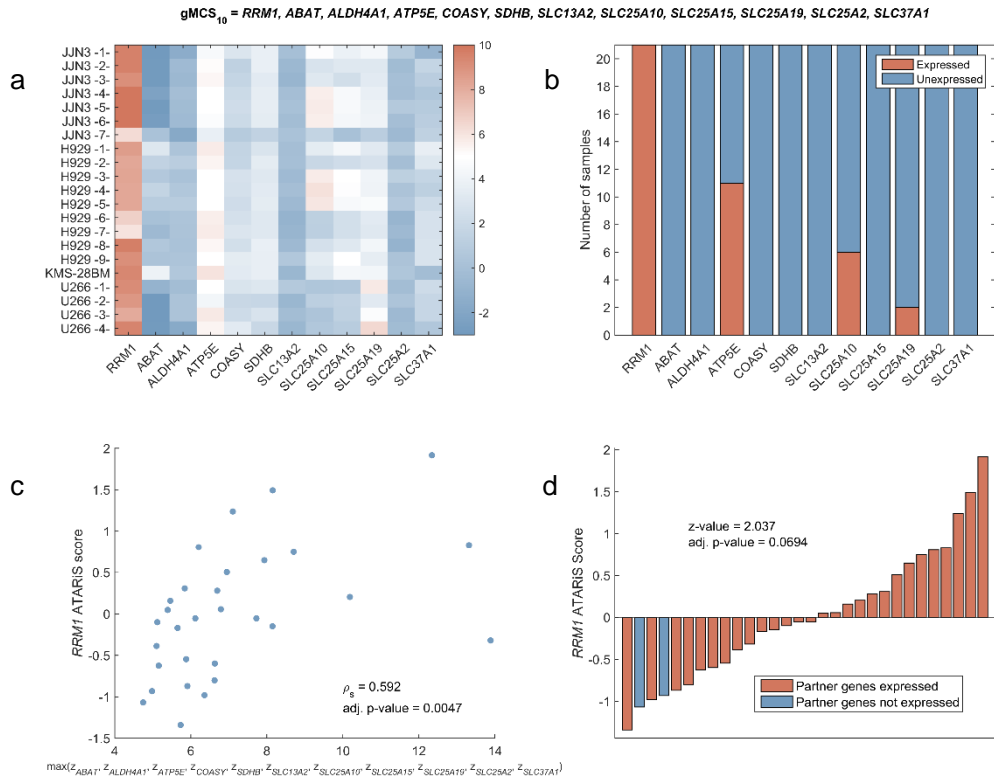

**Supplementary Figure 12: gMCS<sub>10</sub> analysis.** (a) Heatmap of Barcode z-scores<sup>5</sup> of *RRM1* and its partner genes (involved in gMCS<sub>10</sub>) in different MM samples analyzed; (b) Number of MM samples where *RRM1* and its partner genes (involved in gMCS<sub>10</sub>) are expressed/unexpressed, according to Barcode threshold of expression ( $z \geq 5$ ). This gMCS explains the essentiality of *RRM1* in 3 samples; (c) Spearman's correlation analyzing the dependence of *RRM1* ATARIS score on gene expression levels of partner genes in gMCS<sub>10</sub>; (d) Bar plot of *RRM1* ATARIS score when partner genes are (or not) expressed in gMCS<sub>10</sub>. To decide whether a gene is expressed, we used the standard threshold provided by the Gene Expression Barcode algorithm 3.0.



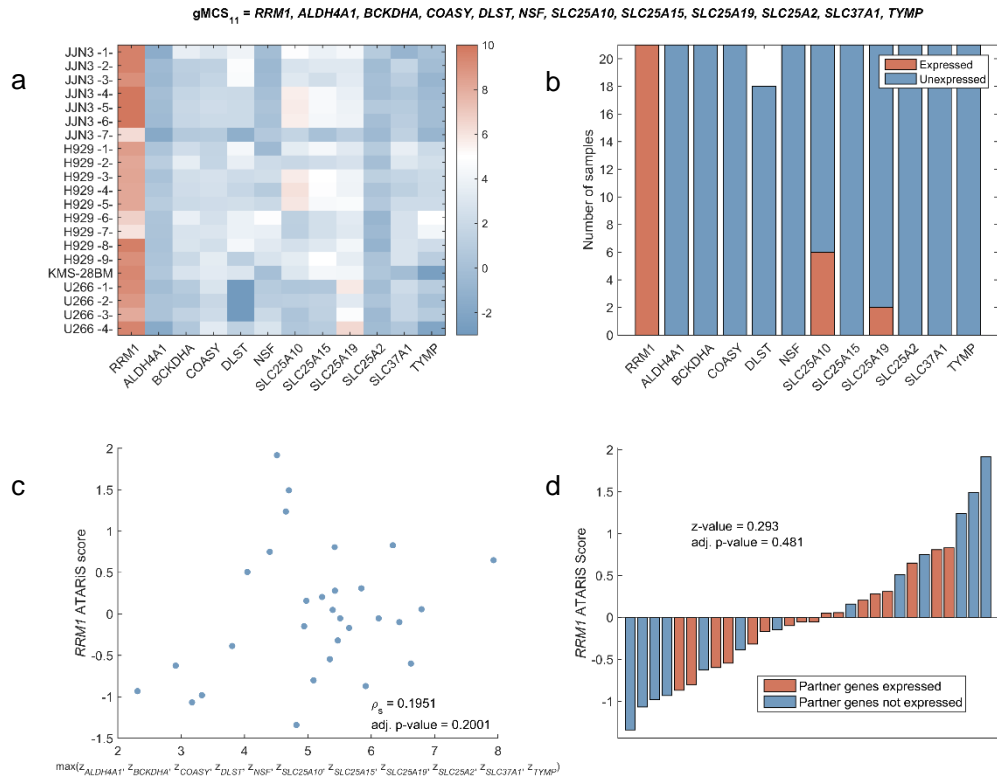

**Supplementary Figure 13: gMCS<sub>11</sub> analysis.** (a) Heatmap of Barcode z-scores<sup>5</sup> of *RRM1* and its partner genes (involved in gMCS<sub>11</sub>) in different MM samples analyzed; (b) Number of MM samples where *RRM1* and its partner genes (involved in gMCS<sub>11</sub>) are expressed/unexpressed, according to Barcode threshold of expression ( $z \geq 5$ ). This gMCS explains the essentiality of *RRM1* in 13 samples; (c) Spearman's correlation analyzing the dependence of *RRM1* ATARIS score on gene expression levels of partner genes in gMCS<sub>11</sub>; (d) Bar plot of *RRM1* ATARIS score when partner genes are (or not) expressed in gMCS<sub>11</sub>. To decide whether a gene is expressed, we used the standard threshold provided by the Gene Expression Barcode algorithm 3.0.

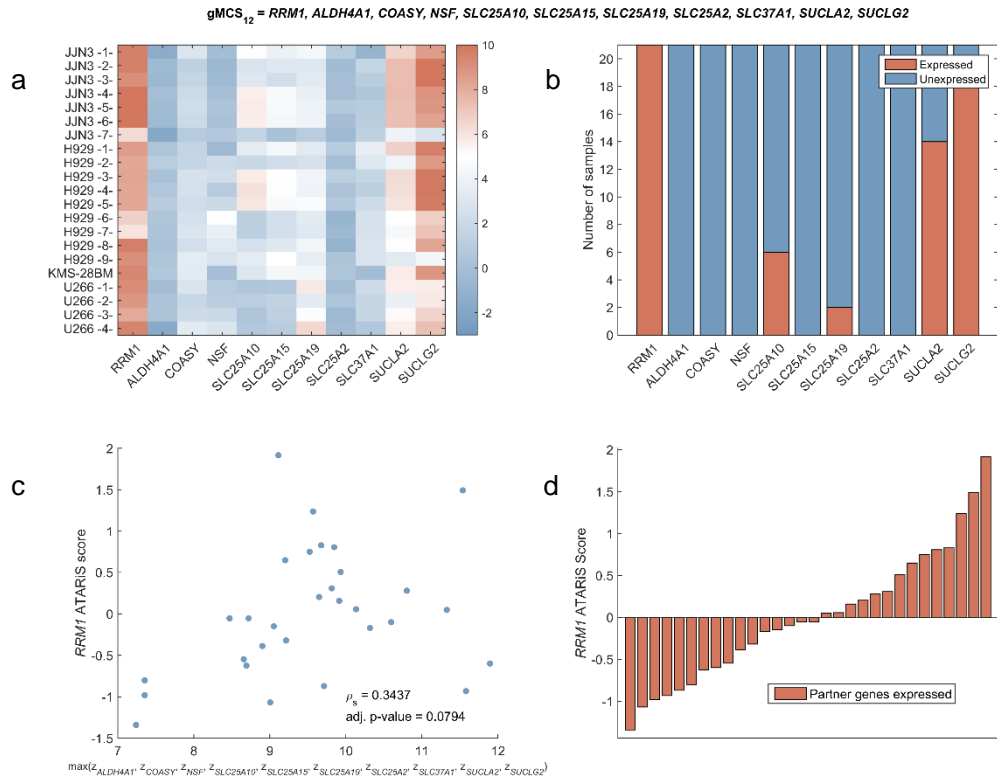

**Supplementary Figure 14: gMCS<sub>12</sub> analysis.** (a) Heatmap of Barcode z-scores<sup>5</sup> of *RRM1* and its partner genes (involved in gMCS<sub>12</sub>) in different MM samples analyzed; (b) Number of MM samples where *RRM1* and its partner genes (involved in gMCS<sub>12</sub>) are expressed/unexpressed, according to Barcode threshold of expression ( $z \geq 5$ ). This gMCS explains the essentiality of *RRM1* in 2 samples; (c) Spearman's correlation analyzing the dependence of *RRM1* ATARIS score on gene expression levels of partner genes in gMCS<sub>12</sub>; (d) Bar plot of *RRM1* ATARIS score when partner genes are (or not) expressed in gMCS<sub>12</sub>. To decide whether a gene is expressed, we used the standard threshold provided by the Gene Expression Barcode algorithm 3.0.

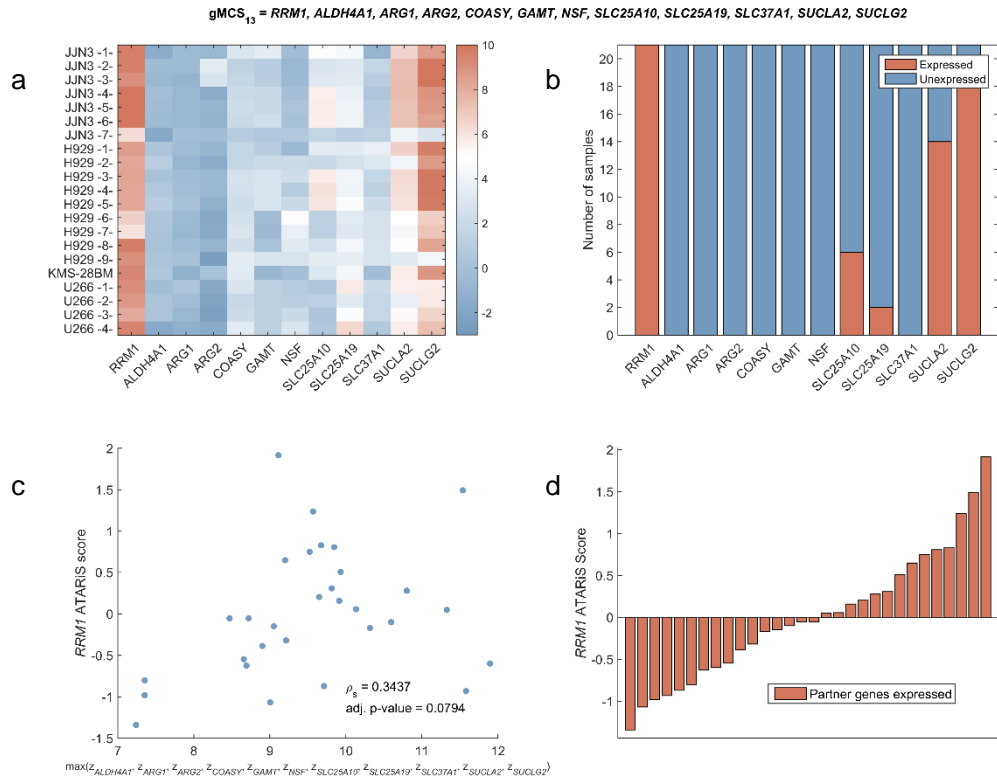

**Supplementary Figure 15: gMCS<sub>13</sub> analysis.** (a) Heatmap of Barcode z-scores<sup>5</sup> of *RRM1* and its partner genes (involved in gMCS<sub>13</sub>) in different MM samples analyzed; (b) Number of MM samples where *RRM1* and its partner genes (involved in gMCS<sub>13</sub>) are expressed/unexpressed, according to Barcode threshold of expression ( $z \geq 5$ ). This gMCS explains the essentiality of *RRM1* in 2 samples; (c) Spearman's correlation analyzing the dependence of *RRM1* ATARIS score on gene expression levels of partner genes in gMCS<sub>13</sub>; (d) Bar plot of *RRM1* ATARIS score when partner genes are (or not) expressed in gMCS<sub>13</sub>. To decide whether a gene is expressed, we used the standard threshold provided by the Gene Expression Barcode algorithm 3.0.

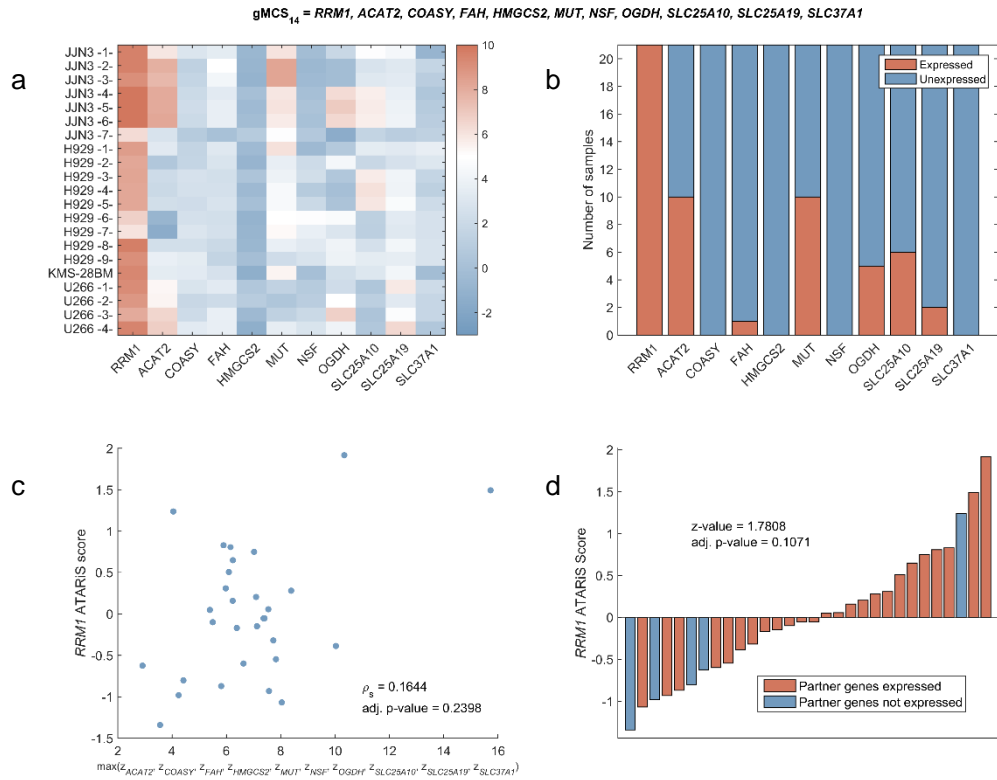

**Supplementary Figure 16: gMCS<sub>14</sub> analysis.** (a) Heatmap of Barcode z-scores<sup>5</sup> of *RRM1* and its partner genes (involved in gMCS<sub>14</sub>) in different MM samples analyzed; (b) Number of MM samples where *RRM1* and its partner genes (involved in gMCS<sub>14</sub>) are expressed/unexpressed, according to Barcode threshold of expression ( $z \geq 5$ ). This gMCS explains the essentiality of *RRM1* in 4 samples; (c) Spearman's correlation analyzing the dependence of *RRM1* ATARIS score on gene expression levels of partner genes in gMCS<sub>14</sub>; (d) Bar plot of *RRM1* ATARIS score when partner genes are (or not) expressed in gMCS<sub>14</sub>. To decide whether a gene is expressed, we used the standard threshold provided by the Gene Expression Barcode algorithm 3.0.

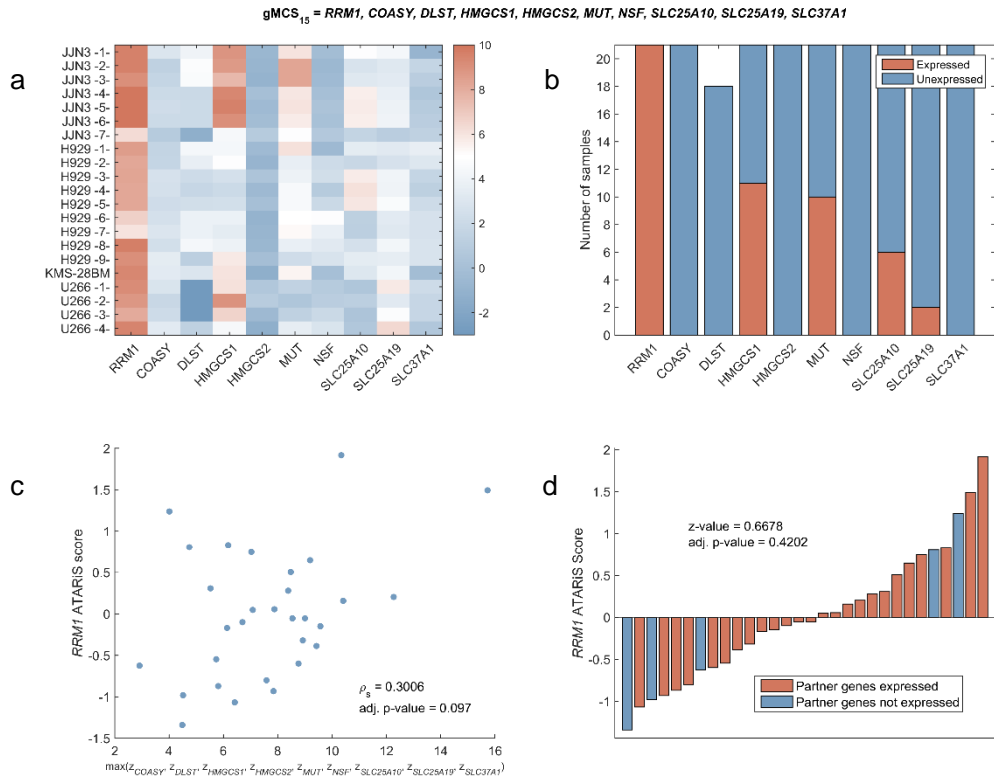

**Supplementary Figure 17: gMCS<sub>15</sub> analysis.** (a) Heatmap of Barcode z-scores<sup>5</sup> of *RRM1* and its partner genes (involved in gMCS<sub>15</sub>) in different MM samples analyzed; (b) Number of MM samples where *RRM1* and its partner genes (involved in gMCS<sub>15</sub>) are expressed/unexpressed, according to Barcode threshold of expression ( $z \geq 5$ ). This gMCS explains the essentiality of *RRM1* in 3 samples; (c) Spearman's correlation analyzing the dependence of *RRM1* ATARIS score on gene expression levels of partner genes in gMCS<sub>15</sub>; (d) Bar plot of *RRM1* ATARIS score when partner genes are (or not) expressed in gMCS<sub>15</sub>. To decide whether a gene is expressed, we used the standard threshold provided by the Gene Expression Barcode algorithm 3.0.

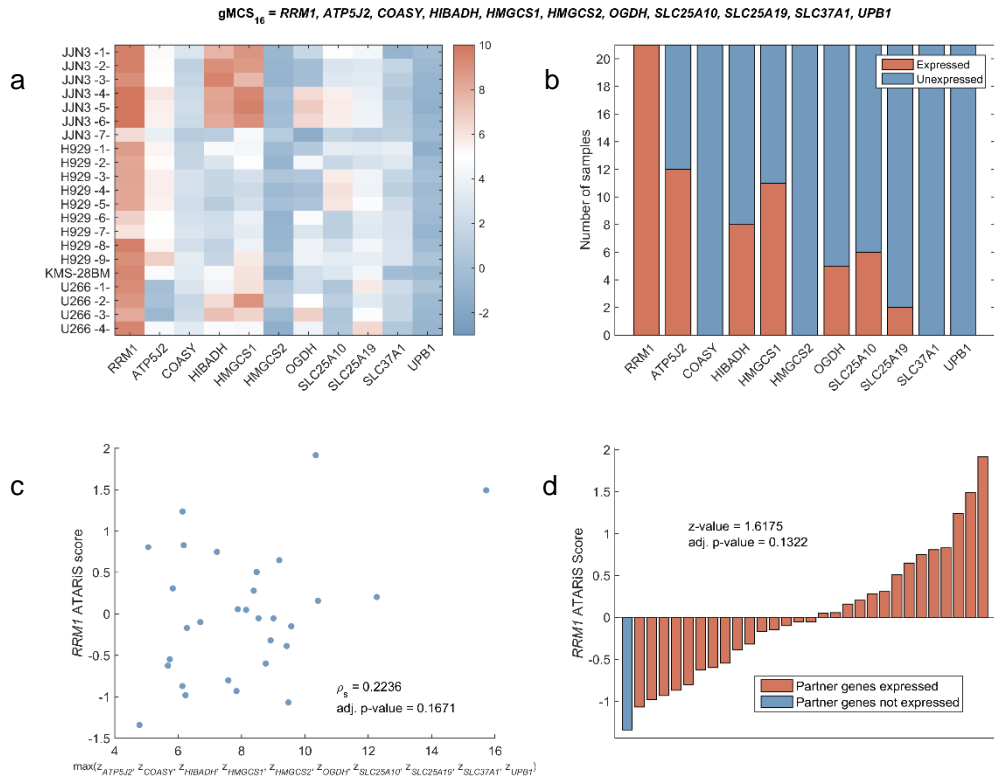

**Supplementary Figure 18: gMCS<sub>16</sub> analysis.** (a) Heatmap of Barcode z-scores<sup>5</sup> of *RRM1* and its partner genes (involved in gMCS<sub>16</sub>) in different MM samples analyzed; (b) Number of MM samples where *RRM1* and its partner genes (involved in gMCS<sub>16</sub>) are expressed/unexpressed, according to Barcode threshold of expression ( $z \geq 5$ ). This gMCS explains the essentiality of *RRM1* in 3 samples; (c) Spearman's correlation analyzing the dependence of *RRM1* ATARIS score on gene expression levels of partner genes in gMCS<sub>16</sub>; (d) Bar plot of *RRM1* ATARIS score when partner genes are (or not) expressed in gMCS<sub>16</sub>. To decide whether a gene is expressed, we used the standard threshold provided by the Gene Expression Barcode algorithm 3.0.

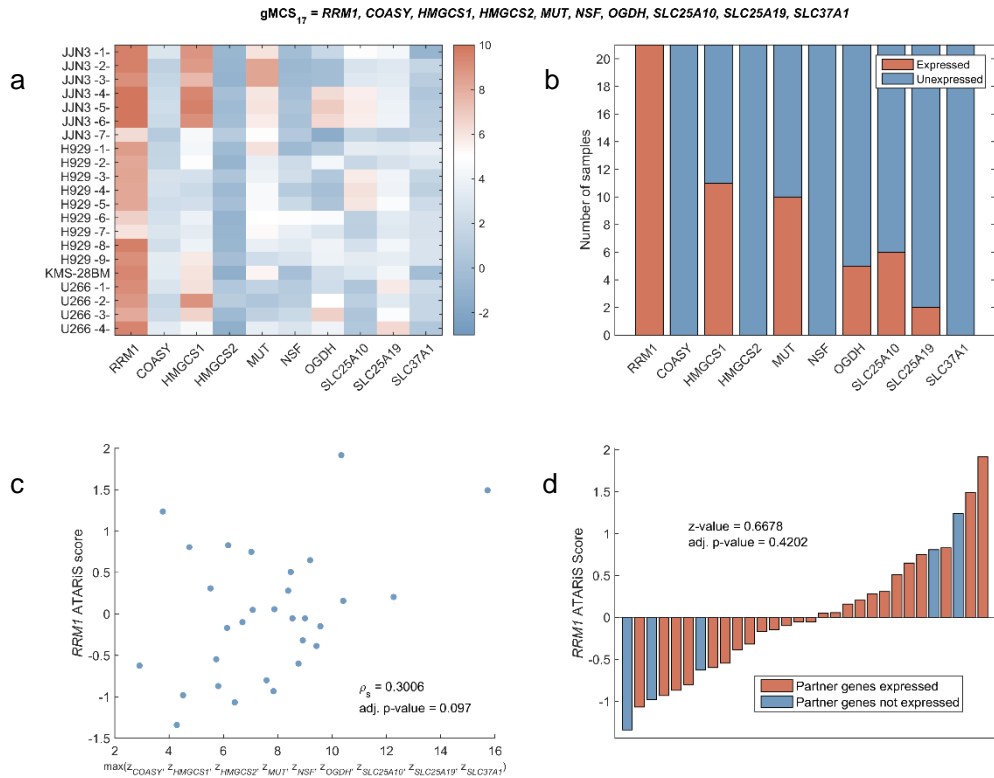

**Supplementary Figure 19: gMCS<sub>17</sub> analysis.** (a) Heatmap of Barcode z-scores<sup>5</sup> of *RRM1* and its partner genes (involved in gMCS<sub>17</sub>) in different MM samples analyzed; (b) Number of MM samples where *RRM1* and its partner genes (involved in gMCS<sub>17</sub>) are expressed/unexpressed, according to Barcode threshold of expression ( $z \geq 5$ ). This gMCS explains the essentiality of *RRM1* in 3 samples; (c) Spearman's correlation analyzing the dependence of *RRM1* ATARIS score on gene expression levels of partner genes in gMCS<sub>17</sub>; (d) Bar plot of *RRM1* ATARIS score when partner genes are (or not) expressed in gMCS<sub>17</sub>. To decide whether a gene is expressed, we used the standard threshold provided by the Gene Expression Barcode algorithm 3.0.

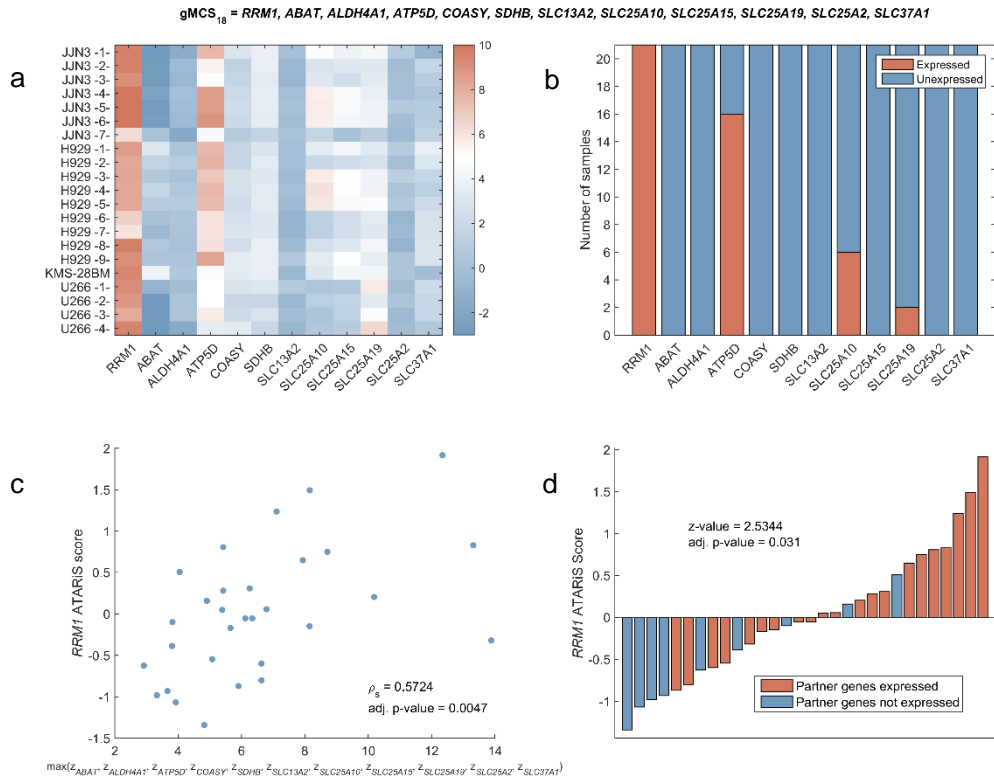

**Supplementary Figure 20: gMCS<sub>18</sub> analysis.** (a) Heatmap of Barcode z-scores<sup>5</sup> of *RRM1* and its partner genes (involved in gMCS<sub>18</sub>) in different MM samples analyzed; (b) Number of MM samples where *RRM1* and its partner genes (involved in gMCS<sub>18</sub>) are expressed/unexpressed, according to Barcode threshold of expression ( $z \geq 5$ ). This gMCS explains the essentiality of *RRM1* in 3 samples; (c) Spearman's correlation analyzing the dependence of *RRM1* ATARIS score on gene expression levels of partner genes in gMCS<sub>18</sub>; (d) Bar plot of *RRM1* ATARIS score when partner genes are (or not) expressed in gMCS<sub>18</sub>. To decide whether a gene is expressed, we used the standard threshold provided by the Gene Expression Barcode algorithm 3.0.



gMCS<sub>19</sub> = *RRM1, ABAT, ACADSB, AGXT2, ALDH4A1, AMT, AQP8, ATP5D, BCAT2, CAT, COQ3, COX7A1, CYP11A1, CYP24A1, CYP27A1, ETNPPL, FPGS, GCDH, GSR, HSD3B1, HSD3B2, IVD, PC, PCCA, PYCR1, SDHC, SLC25A10, SLC25A11, SLC25A15, SLC25A2, UQCRC2*

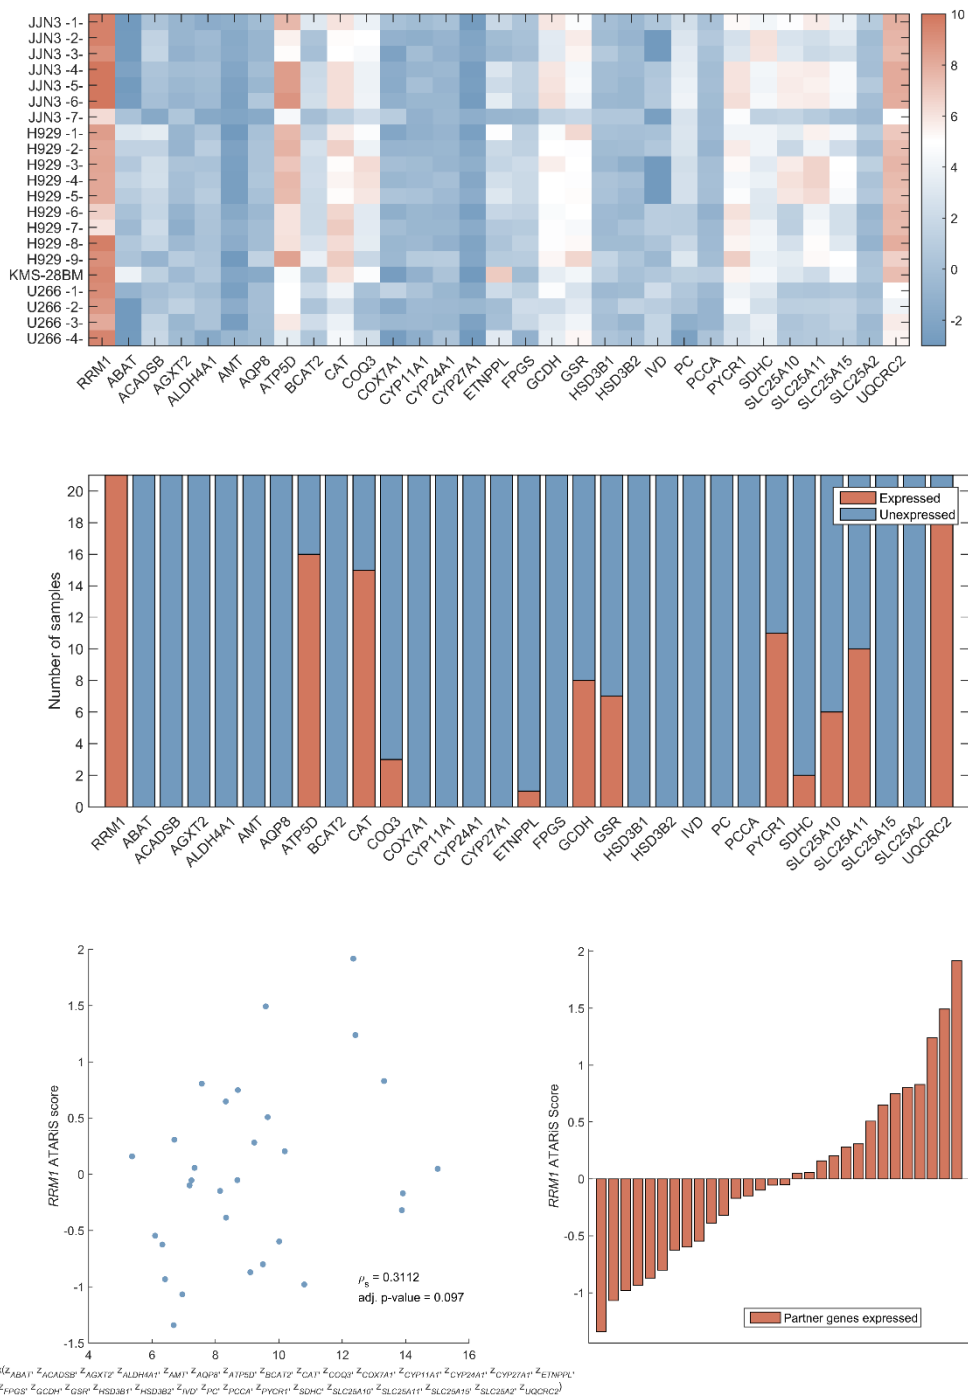

**Supplementary Figure 21: gMCS<sub>19</sub> analysis.** (a) Heatmap of Barcode z-scores<sup>5</sup> of *RRM1* and its partner genes (involved in gMCS<sub>19</sub>) in different MM samples analyzed; (b) Number of MM samples where *RRM1* and its partner genes (involved in gMCS<sub>19</sub>) are expressed/unexpressed, according to Barcode threshold of expression ( $z \geq 5$ ). This gMCS explains the essentiality of *RRM1* in 3 samples; (c) Spearman's correlation analyzing the dependence of *RRM1* ATARIS score on gene expression levels of partner genes in gMCS<sub>19</sub>; (d) Bar plot of *RRM1* ATARIS score when partner genes are (or not) expressed in gMCS<sub>19</sub>. To decide whether a gene is expressed, we used the standard threshold provided by the Gene Expression Barcode algorithm 3.0.

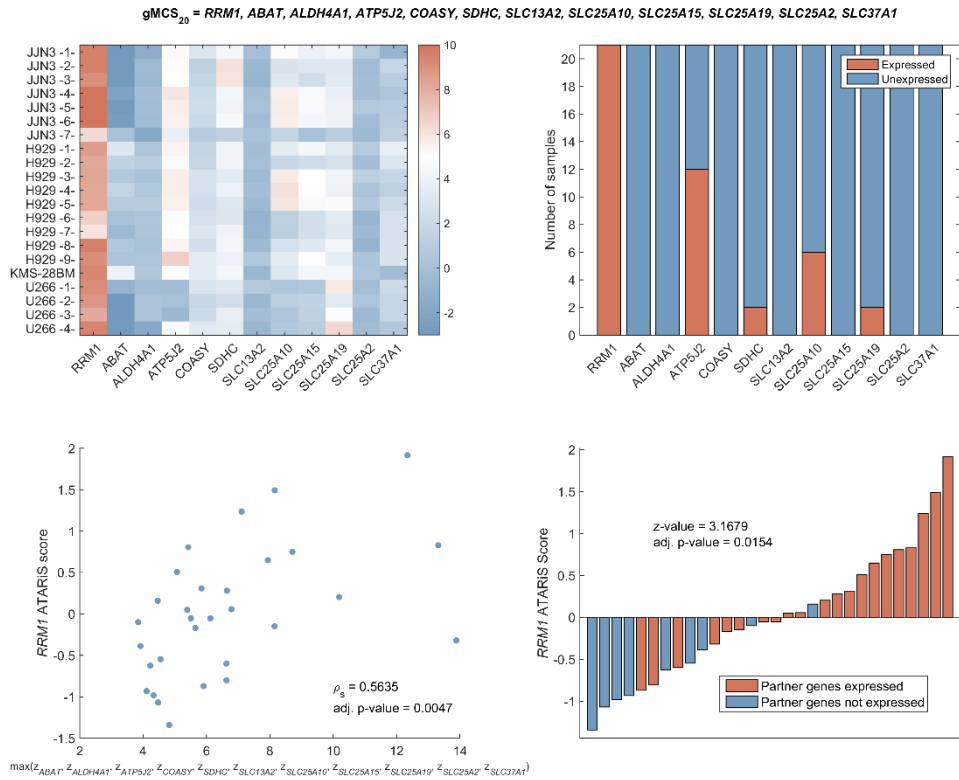

**Supplementary Figure 22: gMCS<sub>20</sub> analysis.** (a) Heatmap of Barcode z-scores<sup>5</sup> of *RRM1* and its partner genes (involved in gMCS<sub>20</sub>) in different MM samples analyzed; (b) Number of MM samples where *RRM1* and its partner genes (involved in gMCS<sub>20</sub>) are expressed/unexpressed, according to Barcode threshold of expression ( $z \geq 5$ ). This gMCS explains the essentiality of *RRM1* in 6 samples; (c) Spearman's correlation analyzing the dependence of *RRM1* ATARIS score on gene expression levels of partner genes in gMCS<sub>20</sub>; (d) Bar plot of *RRM1* ATARIS score when partner genes are (or not) expressed in gMCS<sub>20</sub>. To decide whether a gene is expressed, we used the standard threshold provided by the Gene Expression Barcode algorithm 3.0.

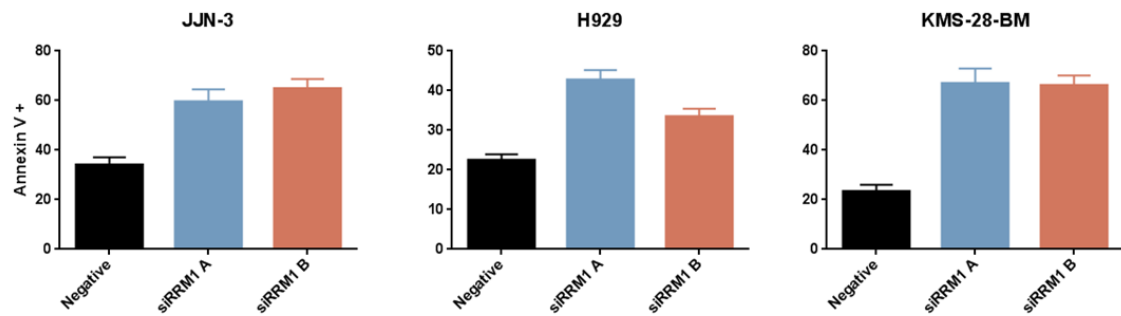

**Supplementary Figure 23:** Apoptosis analysis of JJN-3, H929 and KMS-28-BM cell lines nucleofected with siRNAs targeted to *RRM1* gene. Data represent mean  $\pm$  standard deviation of at least three experiments.

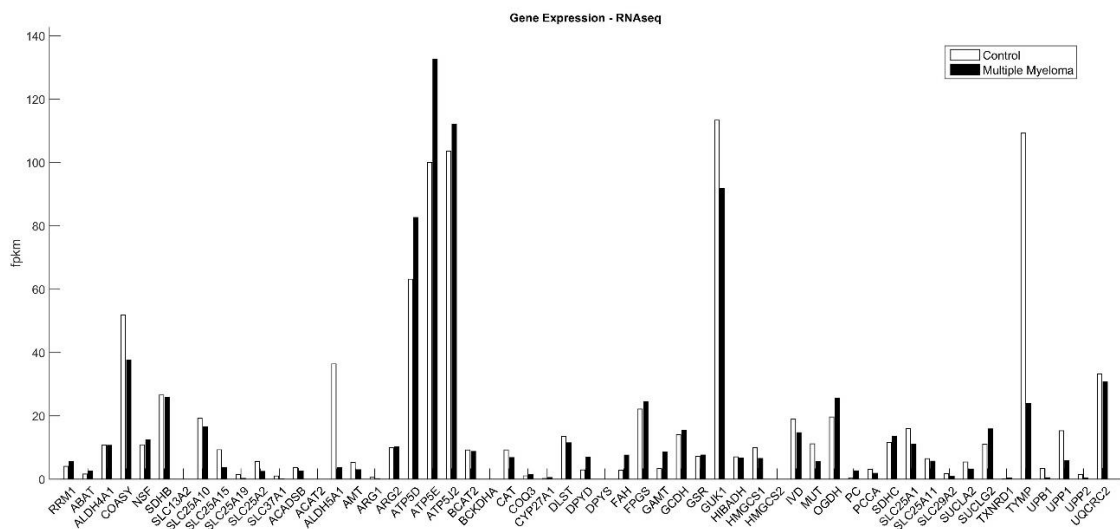

**Supplementary Figure 24:** Average RNAseq expression levels (fpkm) of all genes included in the gMCSs calculated from 11 MM samples and 4 samples of normal plasma cells<sup>13</sup>. The first 12 genes are part of the gMCS shown in the main paper.



**Supplementary Table 1. List of the top 30 cell lines included in Project Achilles**

**v2.4.3 and Cancer Cell Line Encyclopedia.**

| <b>Achilles Accession</b>                   | <b>Cell Line</b> | <b>GSM</b> |
|---------------------------------------------|------------------|------------|
| EFO21_OVARY                                 | EFO-21           | GSM887000  |
| EFE184_ENDOMETRIUM                          | EFE-184          | GSM886997  |
| NCIH23_LUNG                                 | NCI-H23          | GSM887421  |
| RKO_LARGE_INTESTINE                         | RKO              | GSM887541  |
| HT29_LARGE_INTESTINE                        | HT-29            | GSM887141  |
| LAMA84_HAEMATOPOIETIC_AND_LYMPHOID_TISSUE   | LAMA-84          | GSM887262  |
| SKCO1_LARGE_INTESTINE                       | SK-CO-1          | GSM887576  |
| HCC2218_BREAST                              | HCC2218          | GSM887049  |
| PANC0813_PANCREAS                           | Panc 08.13       | GSM887499  |
| ZR7530_BREAST                               | ZR-75-30         | GSM887751  |
| HCC1954_BREAST                              | HCC1954          | GSM887046  |
| HT55_LARGE_INTESTINE                        | HT55             | GSM887142  |
| TE10_OESOPHAGUS                             | TE10             | GSM887691  |
| HCC70_BREAST                                | HCC70            | GSM887058  |
| NCIH1299_LUNG                               | NCI-H1299        | GSM887355  |
| COV362_OVARY                                | COV362           | GSM886963  |
| AGS_STOMACH                                 | AGS              | GSM886864  |
| MDAMB453_BREAST                             | MDA-MB-453       | GSM887300  |
| MCF7_BREAST                                 | MCF7             | GSM887291  |
| MONOMAC6_HAEMATOPOIETIC_AND_LYMPHOID_TISSUE | MONO-MAC-6       | GSM887338  |
| GP2D_LARGE_INTESTINE                        | GP2d             | GSM887027  |
| NCIH661_LUNG                                | NCI-H661         | GSM887441  |
| EFM19_BREAST                                | EFM-19           | GSM886999  |
| SNU840_OVARY                                | SNU-840          | GSM887640  |
| JHOC5_OVARY                                 | JHOC-5           | GSM887175  |
| BT474_BREAST                                | BT-474           | GSM886892  |
| NCIH1437_LUNG                               | NCI-H1437        | GSM887364  |
| PANC0327_PANCREAS                           | Panc 03.27       | GSM887496  |
| BT20_BREAST                                 | BT-20            | GSM886891  |
| MIAPACA2_PANCREAS                           | MIA PaCa-2       | GSM887320  |

**Supplementary Table 2. Contingency table with the essentiality predictions of GIMME in the Project Achilles data.**

|                 |                      | <b>GIMME</b>     |                      |
|-----------------|----------------------|------------------|----------------------|
|                 |                      | <b>Essential</b> | <b>Non-Essential</b> |
| <b>Achilles</b> | <b>Essential</b>     | 49               | 551                  |
|                 | <b>Non-Essential</b> | 24               | 576                  |

**Supplementary Table 3. Contingency table with the essentiality predictions of iMAT in the Project Achilles data.**

|                 |                      | <b>iMAT</b>      |                      |
|-----------------|----------------------|------------------|----------------------|
|                 |                      | <b>Essential</b> | <b>Non-Essential</b> |
| <b>Achilles</b> | <b>Essential</b>     | 35               | 565                  |
|                 | <b>Non-Essential</b> | 29               | 571                  |

**Supplementary Table 4. List of GSMs involved in the *RRMI* analysis in Multiple Myeloma.**

| <b>Accession</b> | <b>Cell Line</b> | <b>GSM</b> |
|------------------|------------------|------------|
| JJN3 -1-         | JJN-3            | GSM229051  |
| JJN3 -2-         | JJN-3            | GSM915718  |
| JJN3 -3-         | JJN-3            | GSM915719  |
| JJN3 -4-         | JJN-3            | GSM915720  |
| JJN3 -5-         | JJN-3            | GSM1094684 |
| JJN3 -6-         | JJN-3            | GSM1094685 |
| JJN3 -7-         | JJN-3            | GSM1374579 |
| H929 -1-         | H929             | GSM351746  |
| H929 -2-         | H929             | GSM451261  |
| H929 -3-         | H929             | GSM451264  |
| H929 -4-         | H929             | GSM451267  |
| H929 -5-         | H929             | GSM511161  |
| H929 -6-         | H929             | GSM511162  |
| H929 -7-         | H929             | GSM511163  |
| H929 -8-         | H929             | GSM562817  |
| H929 -9-         | H929             | GSM662887  |
| KMS-28BM         | KMS-28-BM        | GSM887227  |
| U266 -1-         | U266             | GSM363377  |
| U266 -2-         | U266             | GSM363399  |
| U266 -3-         | U266             | GSM562821  |
| U266 -4-         | U266             | GSM887721  |

**Supplementary Table 5. Summary of adjusted p-values for each gMCS found in the *RRMI* essentiality study in Multiple Myeloma (MM) for different statistical analyses conducted in the main text.**

|                          | Binomial Test |              | Achilles Scatter Plot |              | Achilles Bar Plot |              |
|--------------------------|---------------|--------------|-----------------------|--------------|-------------------|--------------|
|                          | p-value       | adj. p-value | p-value               | adj. p-value | p-value           | adj. p-value |
| <b>gMCS<sub>1</sub></b>  | 0.9255        | 0.9810       | 0.7422                | 0.7624       | 0.7892            | 0.9285       |
| <b>gMCS<sub>2</sub></b>  | 0.00001       | 0.0007       | 0.7624                | 0.7624       | 0.3587            | 0.4782       |
| <b>gMCS<sub>3</sub></b>  | 0.00001       | 0.0007       | 0.7009                | 0.7624       | 0.3587            | 0.4782       |
| <b>gMCS<sub>4</sub></b>  | 0.00001       | 0.0007       | 0.7009                | 0.7624       | 0.3587            | 0.4782       |
| <b>gMCS<sub>5</sub></b>  | 0.4334        | 0.9631       | 0.0012                | 0.006        | 0.0062            | 0.031        |
| <b>gMCS<sub>6</sub></b>  | 0.0004        | 0.0019       | 0.0018                | 0.0071       | 0.003             | 0.0298       |
| <b>gMCS<sub>7</sub></b>  | 0.0206        | 0.0589       | 0.0953                | 0.1466       | 0.0922            | 0.2049       |
| <b>gMCS<sub>8</sub></b>  | 0.0561        | 0.1404       | 0.0037                | 0.0122       | 0.0207            | 0.0694       |
| <b>gMCS<sub>9</sub></b>  | 0.0064        | 0.0214       | 0.064                 | 0.1067       | 0.1542            | 0.3085       |
| <b>gMCS<sub>10</sub></b> | 0.9255        | 0.9810       | 0.0004                | 0.0047       | 0.0208            | 0.0694       |
| <b>gMCS<sub>11</sub></b> | 0.0064        | 0.0214       | 0.1501                | 0.2001       | 0.3848            | 0.4810       |
| <b>gMCS<sub>12</sub></b> | 0.9810        | 0.9810       | 0.0318                | 0.0794       | - *               | - *          |
| <b>gMCS<sub>13</sub></b> | 0.9810        | 0.9810       | 0.0318                | 0.0794       | - *               | - *          |
| <b>gMCS<sub>14</sub></b> | 0.8083        | 0.9810       | 0.1919                | 0.2398       | 0.0375            | 0.1071       |
| <b>gMCS<sub>15</sub></b> | 0.9255        | 0.9810       | 0.0534                | 0.097        | 0.2521            | 0.4202       |
| <b>gMCS<sub>16</sub></b> | 0.9255        | 0.9810       | 0.117                 | 0.1671       | 0.0529            | 0.1322       |
| <b>gMCS<sub>17</sub></b> | 0.9255        | 0.9810       | 0.0534                | 0.097        | 0.2521            | 0.4202       |
| <b>gMCS<sub>18</sub></b> | 0.9255        | 0.9810       | 0.0006                | 0.0047       | 0.0056            | 0.031        |
| <b>gMCS<sub>19</sub></b> | 0.9255        | 0.9810       | 0.0472                | 0.097        | - *               | - *          |
| <b>gMCS<sub>20</sub></b> | 0.6326        | 0.9810       | 0.0007                | 0.0047       | 0.0008            | 0.0154       |

\* In these cases, all cell lines were assigned to a single class and, therefore, Mann-Whitney test could not be calculated.



**Supplementary Table 6. Prediction of the essentiality of *RRM1* at the sample and cell line level in the MM study.** Green coloring implies essentiality of *RRM1*, while red coloring non-essentiality.

| GSM        | gMCS  | GIMME | iMAT  | Cell Line | gMCS  | GIMME | iMAT  |
|------------|-------|-------|-------|-----------|-------|-------|-------|
| GSM229051  | Green | Green | Green | JJN3      | Green | Green | Green |
| GSM915718  | Green | Green | Red   |           |       |       |       |
| GSM915719  | Green | Green | Red   |           |       |       |       |
| GSM915720  | Green | Green | Red   |           |       |       |       |
| GSM1094684 | Green | Red   | Red   |           |       |       |       |
| GSM1094685 | Green | Red   | Red   |           |       |       |       |
| GSM1374579 | Green | Red   | Red   |           |       |       |       |
| GSM351746  | Green | Red   | Red   | H929      | Green | Red   | Green |
| GSM451261  | Green | Red   | Red   |           |       |       |       |
| GSM451264  | Green | Red   | Red   |           |       |       |       |
| GSM451267  | Green | Red   | Green |           |       |       |       |
| GSM511161  | Green | Green | Red   |           |       |       |       |
| GSM511162  | Green | Green | Red   |           |       |       |       |
| GSM511163  | Green | Green | Green |           |       |       |       |
| GSM562817  | Green | Green | Red   |           |       |       |       |
| GSM662887  | Green | Red   | Red   |           |       |       |       |
| GSM887227  | Green | Green | Red   |           |       |       |       |
| GSM363377  | Red   | Green | Green | U266      | Red   | Green | Red   |
| GSM363399  | Green | Green | Red   |           |       |       |       |
| GSM562821  | Green | Green | Red   |           |       |       |       |
| GSM887721  | Red   | Green | Red   |           |       |       |       |

**Supplementary Table 7. Summary of adjusted Spearman's correlation p-values in Achilles Scatter plots of different gMCSs using max, mean and sum of the expression of the partner genes of *RRM1*.**

|                          | Achilles Scatter Plot -<br>MAX |              | Achilles Scatter Plot -<br>MEAN |              | Achilles Scatter Plot -<br>SUM |              |
|--------------------------|--------------------------------|--------------|---------------------------------|--------------|--------------------------------|--------------|
|                          | p-value                        | adj. p-value | p-value                         | adj. p-value | p-value                        | adj. p-value |
| <b>gMCS<sub>1</sub></b>  | 0.7422                         | 0.7624       | 0.7422                          | 0.87315      | 0.7422                         | 0.87315      |
| <b>gMCS<sub>2</sub></b>  | 0.7624                         | 0.7624       | 0.8914                          | 0.89136      | 0.8914                         | 0.89136      |
| <b>gMCS<sub>3</sub></b>  | 0.7009                         | 0.7624       | 0.8414                          | 0.88566      | 0.8414                         | 0.88566      |
| <b>gMCS<sub>4</sub></b>  | 0.7009                         | 0.7624       | 0.7894                          | 0.8771       | 0.7894                         | 0.8771       |
| <b>gMCS<sub>5</sub></b>  | 0.0012                         | 0.006        | 0.0012                          | 0.00496      | 0.0012                         | 0.00496      |
| <b>gMCS<sub>6</sub></b>  | 0.0018                         | 0.0071       | 0.004                           | 0.01128      | 0.004                          | 0.01128      |
| <b>gMCS<sub>7</sub></b>  | 0.0953                         | 0.1466       | 0.0151                          | 0.03357      | 0.0151                         | 0.03357      |
| <b>gMCS<sub>8</sub></b>  | 0.0037                         | 0.0122       | 0.0069                          | 0.01727      | 0.0069                         | 0.01727      |
| <b>gMCS<sub>9</sub></b>  | 0.064                          | 0.1067       | 0.1218                          | 0.16238      | 0.1218                         | 0.16238      |
| <b>gMCS<sub>10</sub></b> | 0.0004                         | 0.0047       | 0.0006                          | 0.004        | 0.0006                         | 0.004        |
| <b>gMCS<sub>11</sub></b> | 0.1501                         | 0.2001       | 0.1146                          | 0.16238      | 0.1146                         | 0.16238      |
| <b>gMCS<sub>12</sub></b> | 0.0318                         | 0.0794       | 0.0039                          | 0.01128      | 0.0039                         | 0.01128      |
| <b>gMCS<sub>13</sub></b> | 0.0318                         | 0.0794       | 0.1627                          | 0.20338      | 0.1627                         | 0.20338      |
| <b>gMCS<sub>14</sub></b> | 0.1919                         | 0.2398       | 0.0361                          | 0.0602       | 0.0361                         | 0.0602       |
| <b>gMCS<sub>15</sub></b> | 0.0534                         | 0.097        | 0.0210                          | 0.0382       | 0.0210                         | 0.0382       |
| <b>gMCS<sub>16</sub></b> | 0.117                          | 0.1671       | 0.0205                          | 0.0382       | 0.0205                         | 0.0382       |
| <b>gMCS<sub>17</sub></b> | 0.0534                         | 0.097        | 0.046                           | 0.0707       | 0.046                          | 0.0707       |
| <b>gMCS<sub>18</sub></b> | 0.0006                         | 0.0047       | 0.0008                          | 0.004        | 0.0008                         | 0.004        |
| <b>gMCS<sub>19</sub></b> | 0.0472                         | 0.097        | 0.0008                          | 0.004        | 0.0008                         | 0.004        |
| <b>gMCS<sub>20</sub></b> | 0.0007                         | 0.0047       | 0.0004                          | 0.004        | 0.0004                         | 0.004        |

## Supplementary References

1. Klamt, S. & Gilles, E. D. Minimal cut sets in biochemical reaction networks. *Bioinformatics (Oxford, England)* **20**, 226–234 (2004).
2. Tobalina, L., Pey, J. & Planes, F. J. Direct calculation of minimal cut sets involving a specific reaction knock-out. *Bioinformatics (Oxford, England)* **32**, 2001–2007 (2016).
3. Shlomi, T., Cabili, M. N., Herrgård, M. J., Palsson, B. O. & Ruppin, E. Network-based prediction of human tissue-specific metabolism. *Nat Biotech* **26**, 1003–1010 (2008).
4. Becker, S. A. & Palsson, B. O. Context-Specific Metabolic Networks Are Consistent with Experiments. *PLOS Computational Biology* **4**, e1000082– (2008).
5. McCall, M. N. *et al.* The Gene Expression Barcode 3.0: improved data processing and mining tools. *Nucleic acids research* **42**, 938–43 (2014).
6. Kamp, A. von & Klamt, S. Enumeration of Smallest Intervention Strategies in Genome-Scale Metabolic Networks. *PLOS Computational Biology* **10**, e1003378– (2014).
7. Thiele, I. *et al.* A community-driven global reconstruction of human metabolism. *Nat Biotech* **31**, 419–425 (2013).
8. Aye, Y., Li, M., Long, M. J. C. & Weiss, R. S. Ribonucleotide reductase and cancer: biological mechanisms and targeted therapies. *Oncogene* **34**, 2011–2021 (2015).
9. Nordlund, P. & Reichard, P. Ribonucleotide Reductases. *Annu. Rev. Biochem.* **75**, 681–706 (2006).
10. Kanehisa, M., Sato, Y., Kawashima, M., Furumichi, M. & Tanabe, M. KEGG as a reference resource for gene and protein annotation. *Nucleic acids research* **44**, 457–62 (2016).
11. Kohnken, R., Kodigepalli, K. M. & Wu, L. Regulation of deoxynucleotide metabolism in cancer: novel mechanisms and therapeutic implications. *Molecular cancer* **14**, 176– (2015).
12. Tiedemann, R. E. *et al.* Identification of Molecular Vulnerabilities in Human Multiple Myeloma Cells by RNA Interference Lethality Screening of the Druggable Genome. *Cancer Res* **72**, 757– (2012).
13. Agirre, X. *et al.* Whole-epigenome analysis in multiple myeloma reveals DNA hypermethylation of B cell-specific enhancers. *Genome Research* **25**, 478–487 (2015).
